# Supplementary material for: Total synthesis and revision of the absolute configuration of seimatopolide B
Source: Royal Society of Chemistry journal article supplement (doi:10.1039/c3ob27518c), 2013-01-01
Supplement: c3ob27518c.pdf [file c3ob27518c.pdf]

## **Total synthesis and revision of the absolute configuration of seimatopolide B**

Chada Raji Reddy,\* Uredi Dilipkumar, Motatipally Damoder Reddy and Nagavaram Narsimha Rao

*Division of Natural Products Chemistry, CSIR-Indian Institute of Chemical Technology,  
Hyderabad 500 007, India*

E-mail: [rajireddy@iict.res.in](mailto:rajireddy@iict.res.in)

- **Copies of  $^1\text{H}$  and  $^{13}\text{C}$  NMR spectra** (Page 2 - 21)
- **NOESY Spectrum for 2a** (Page 22)
- **Chiral HPLC Chromatograms** (Page 23 - 29)

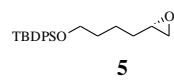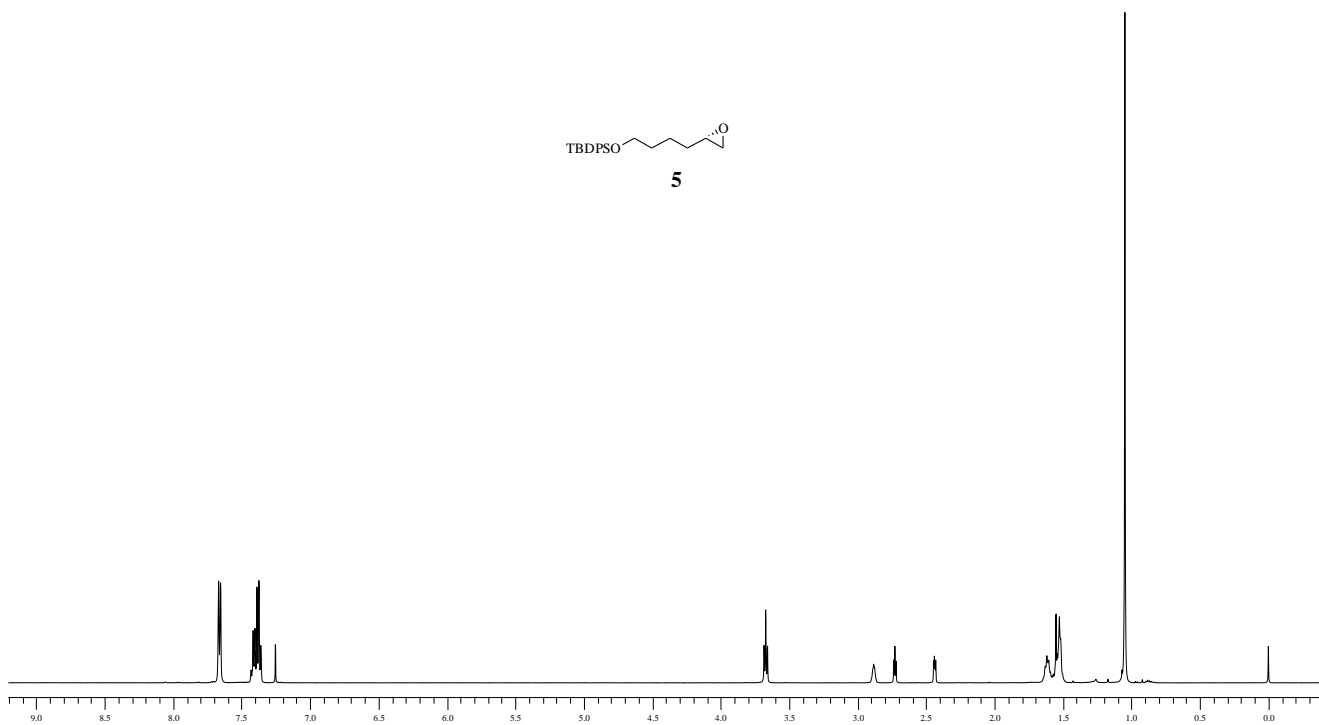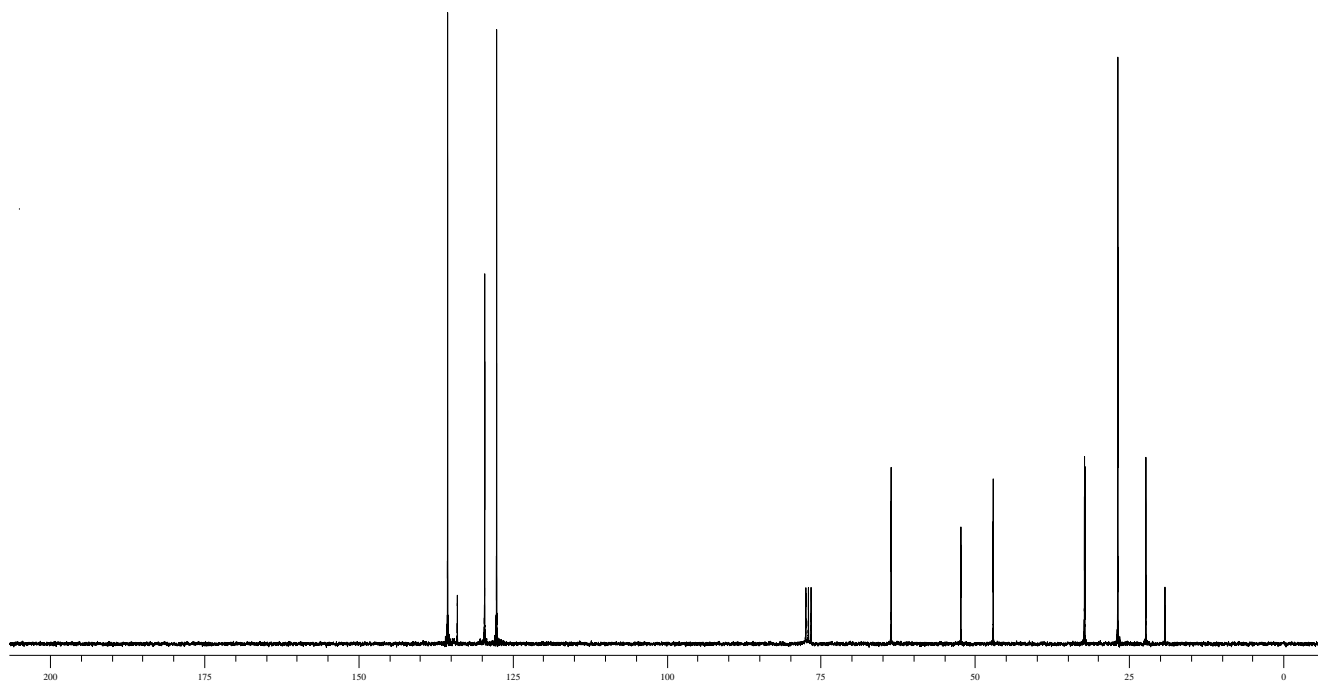

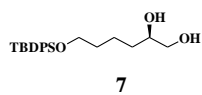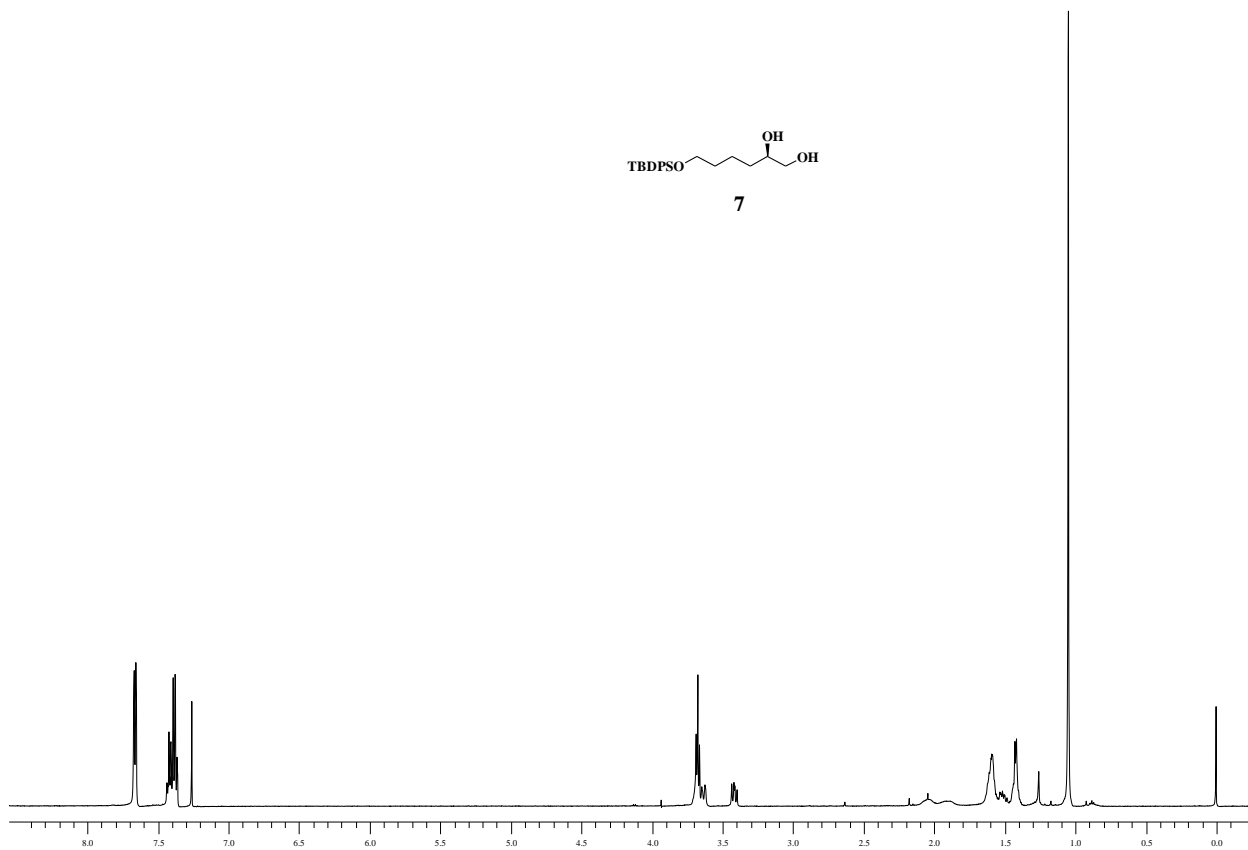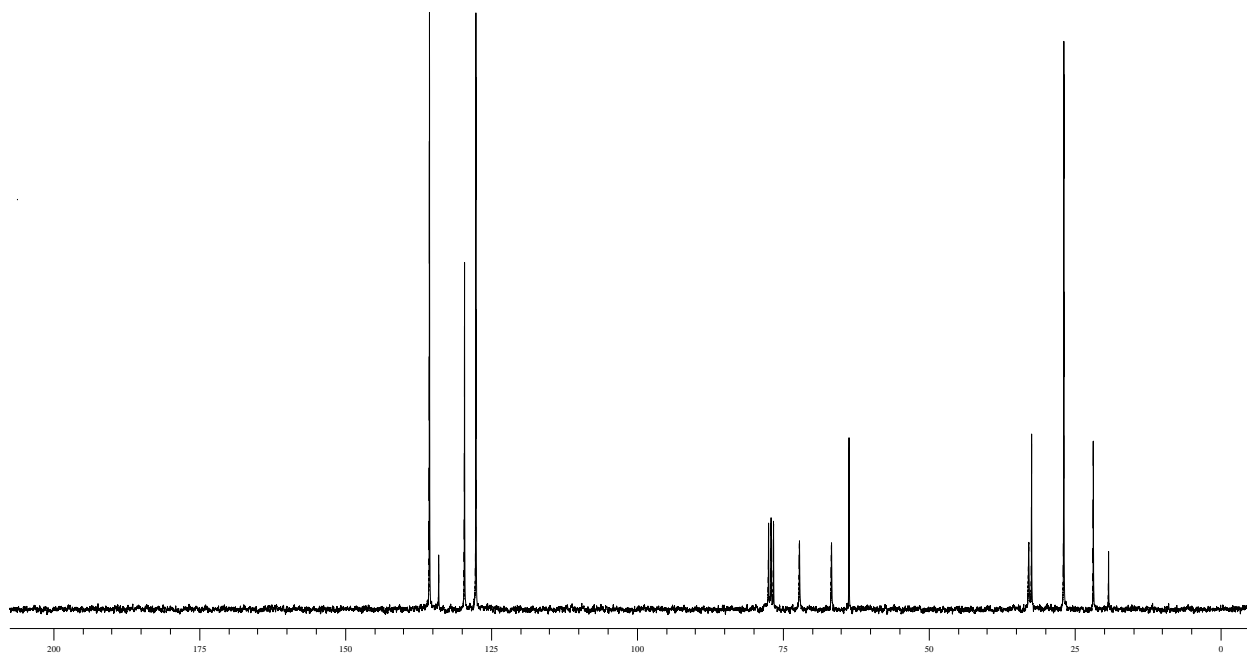

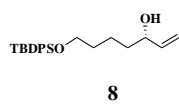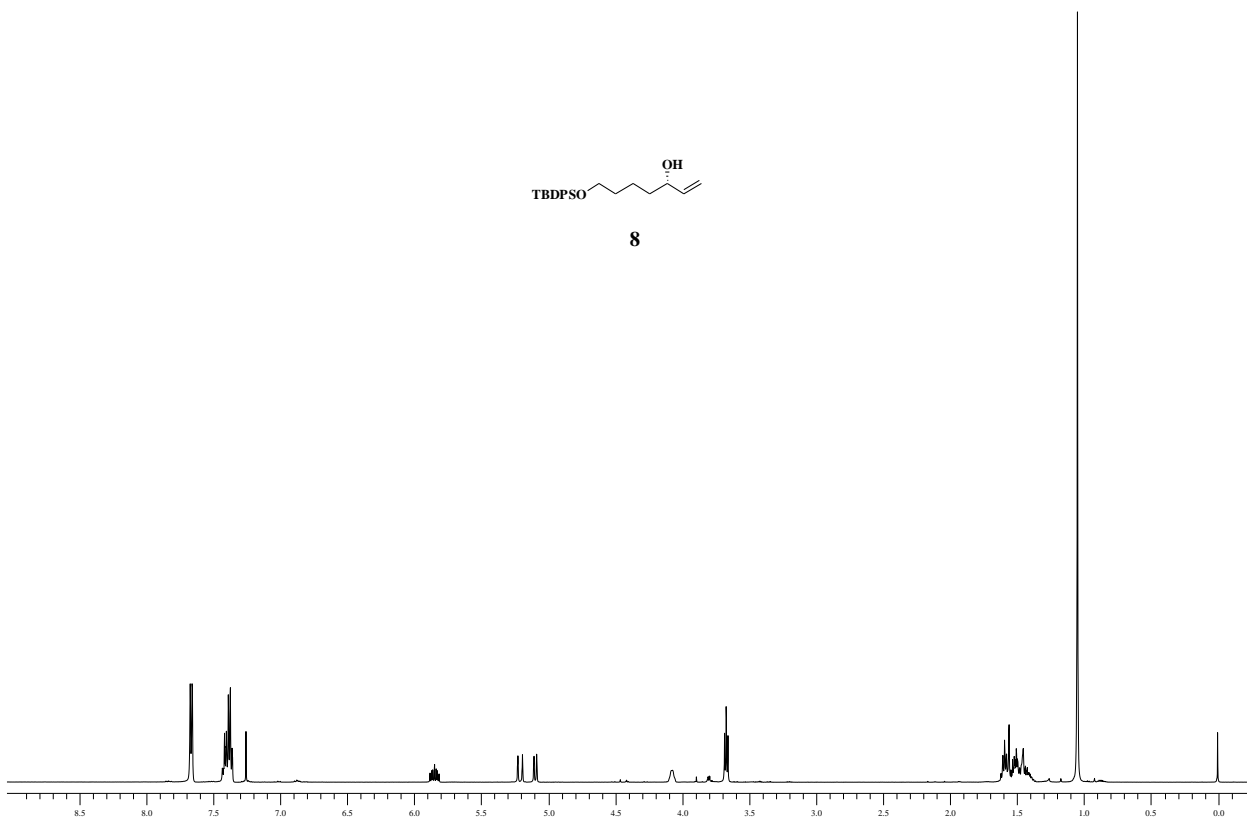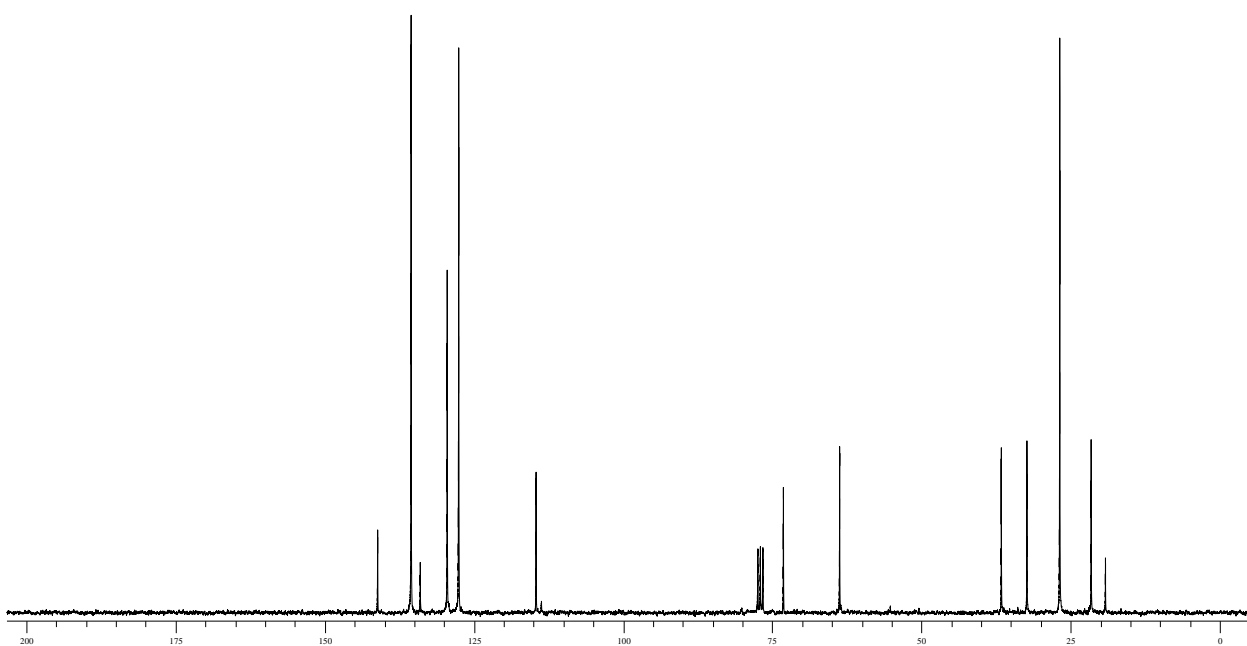

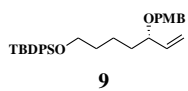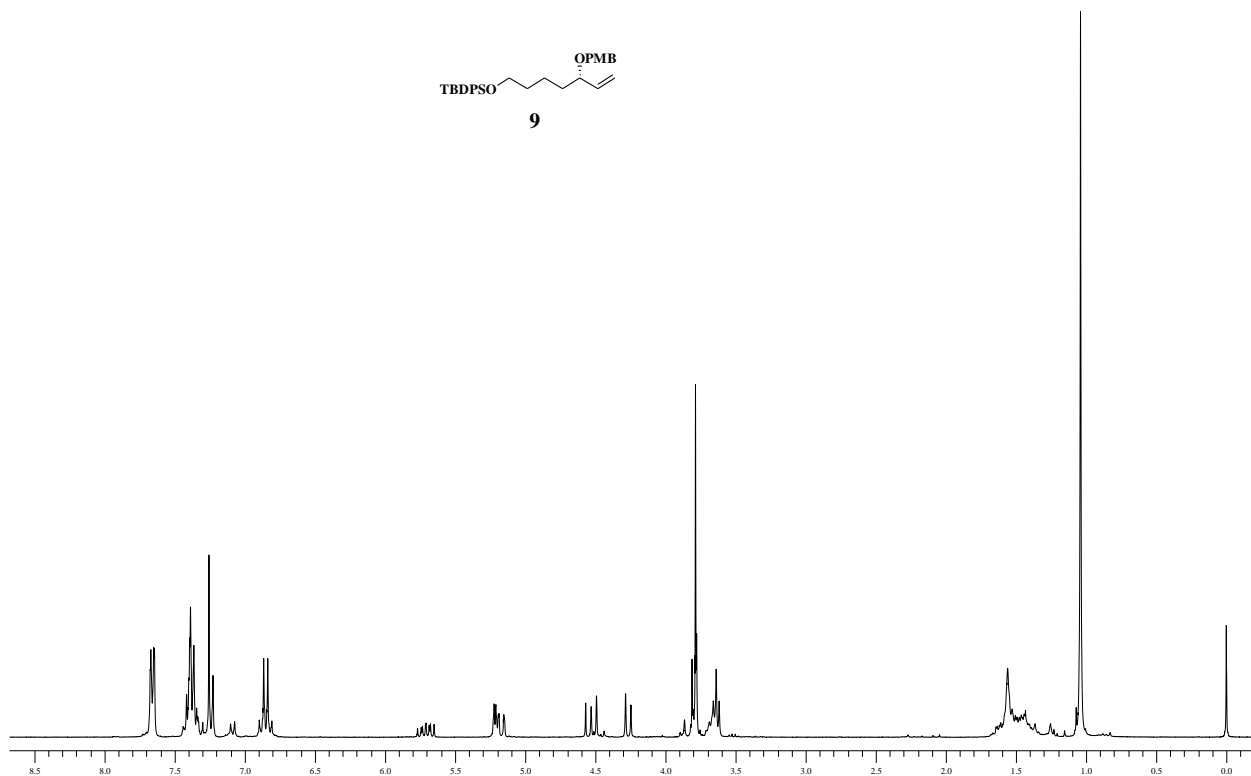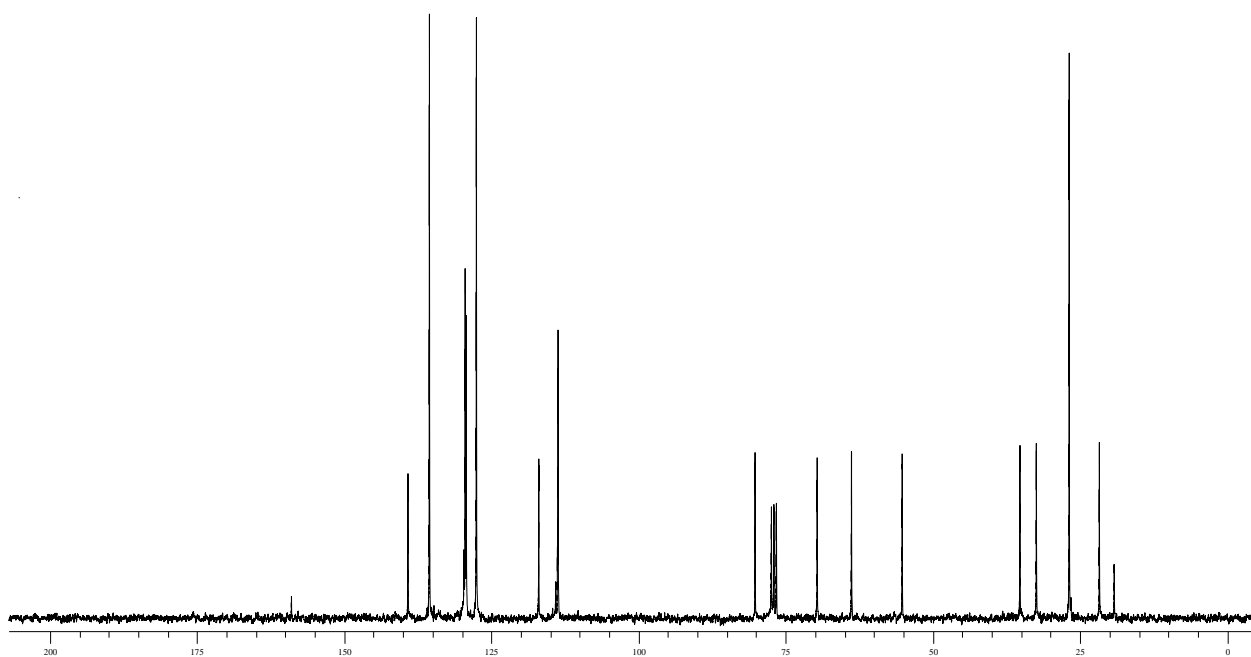

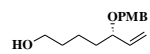

**10**

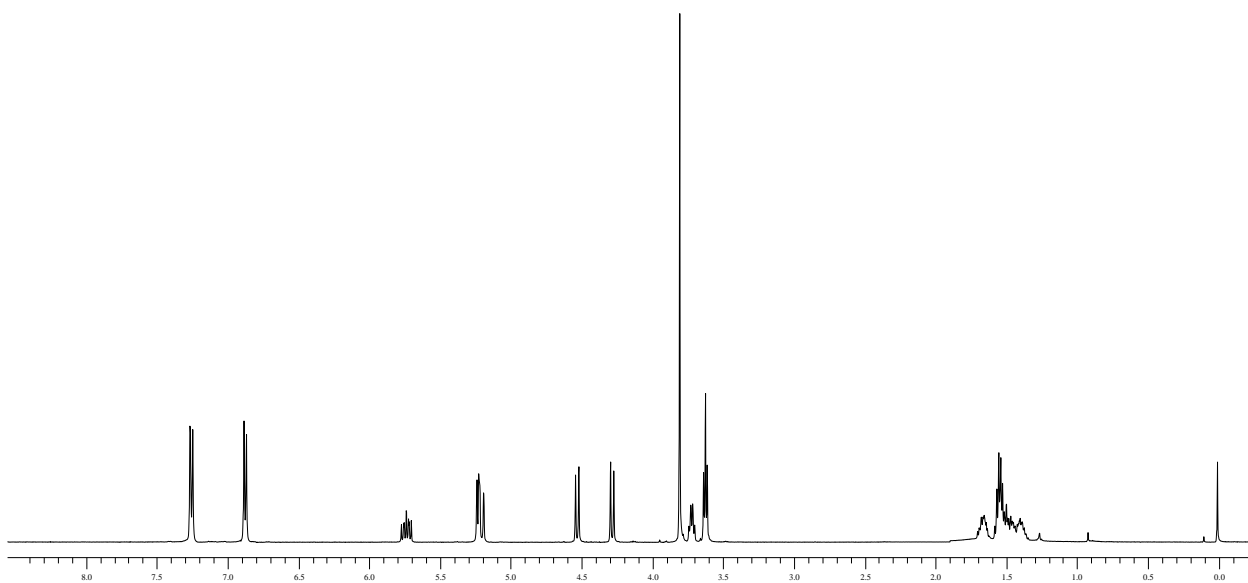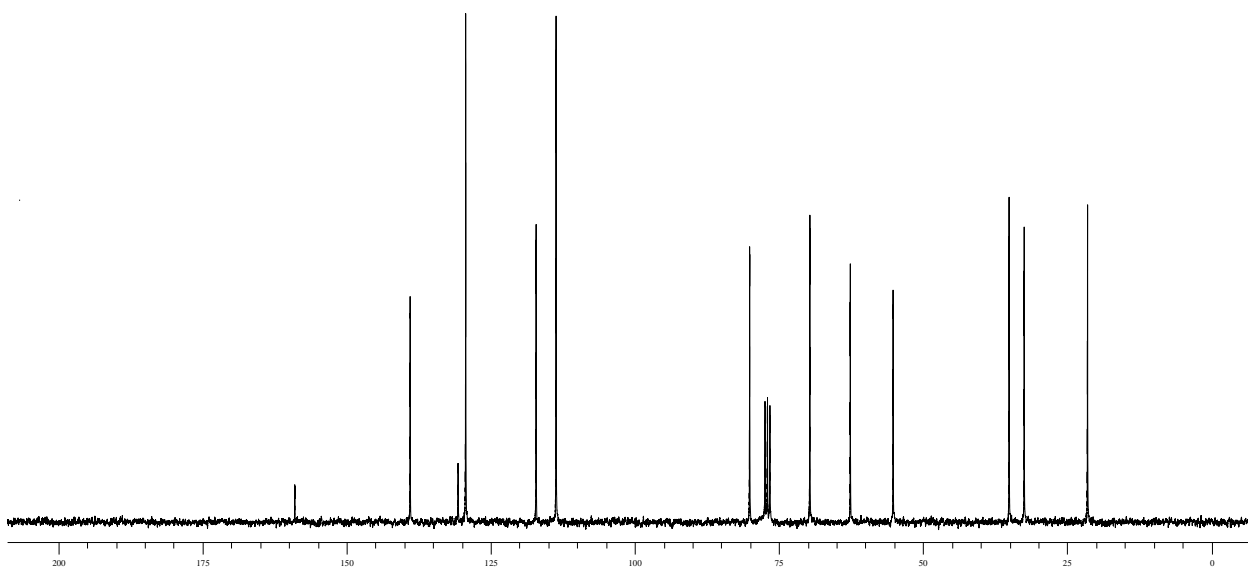

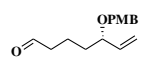

11

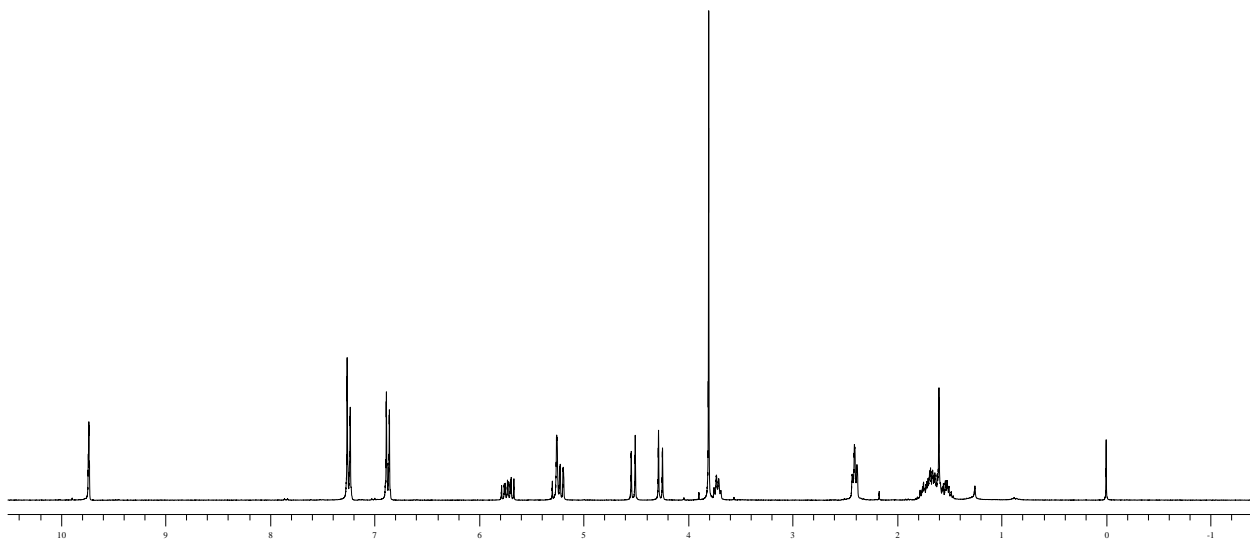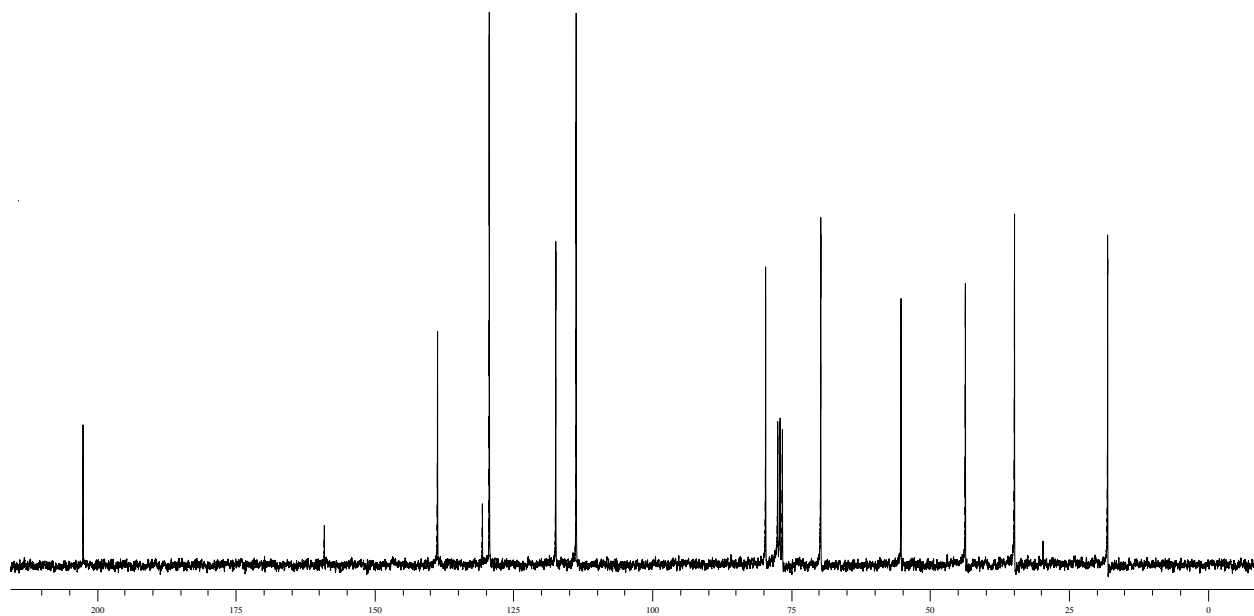

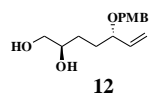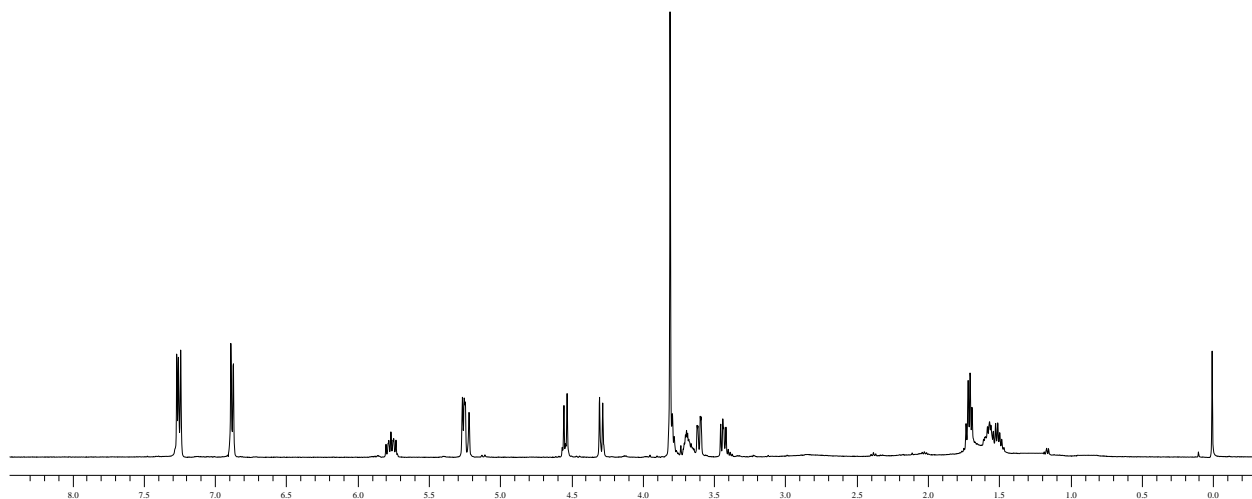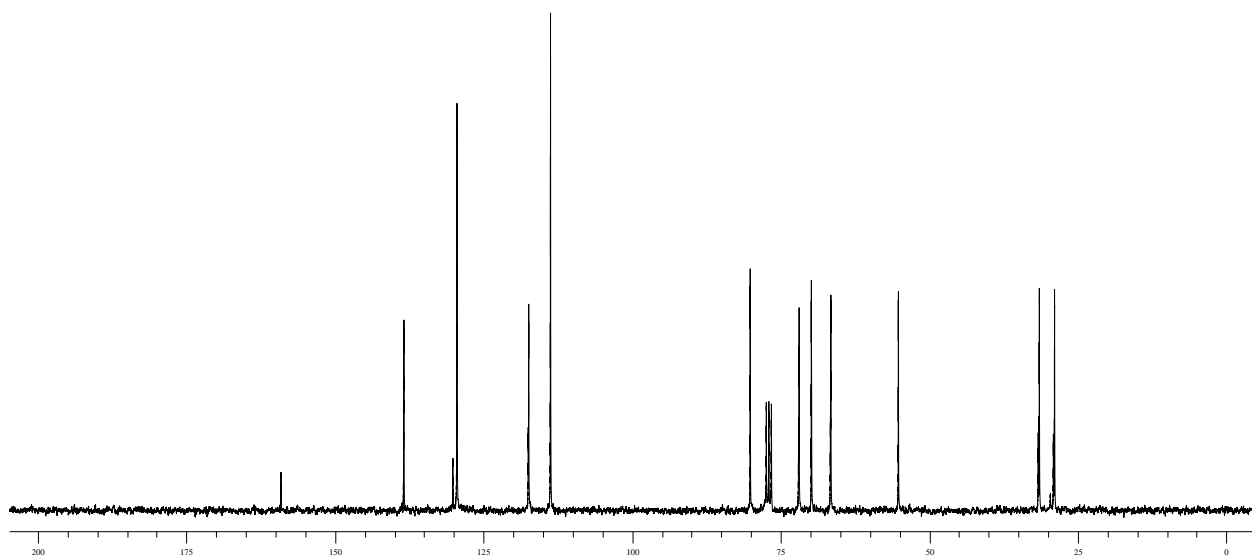



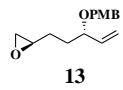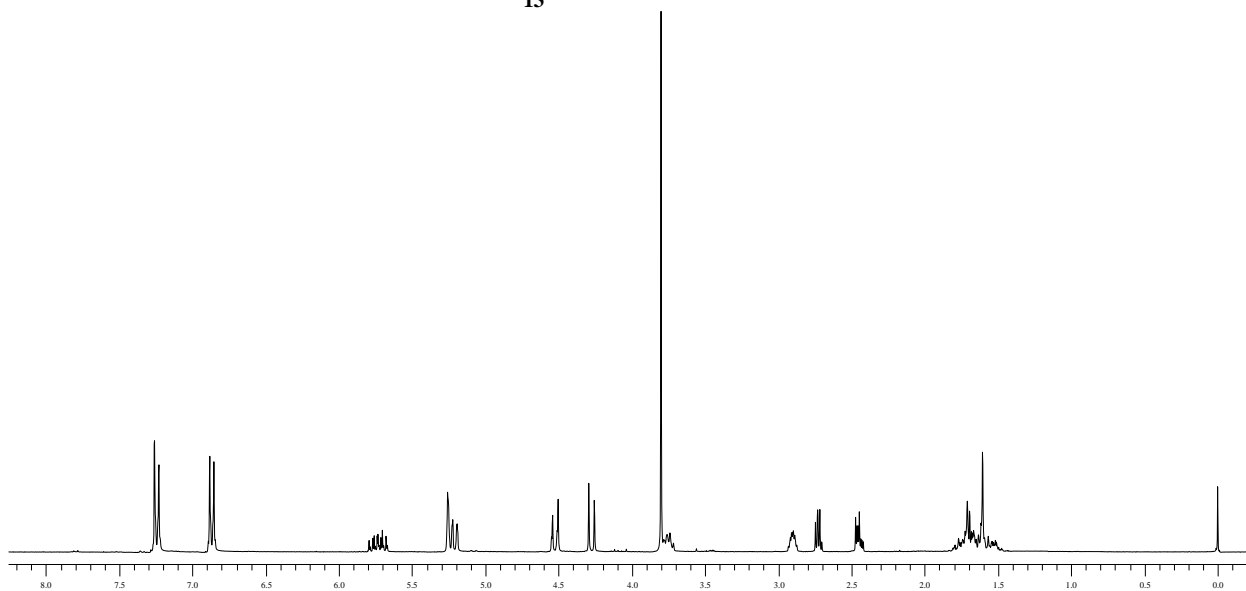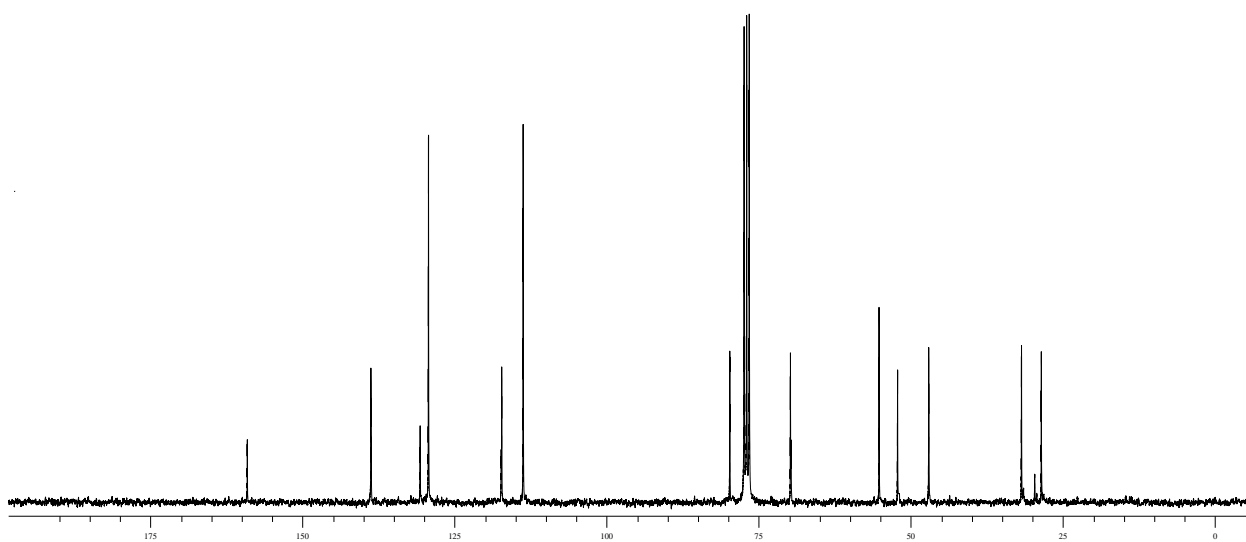

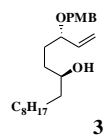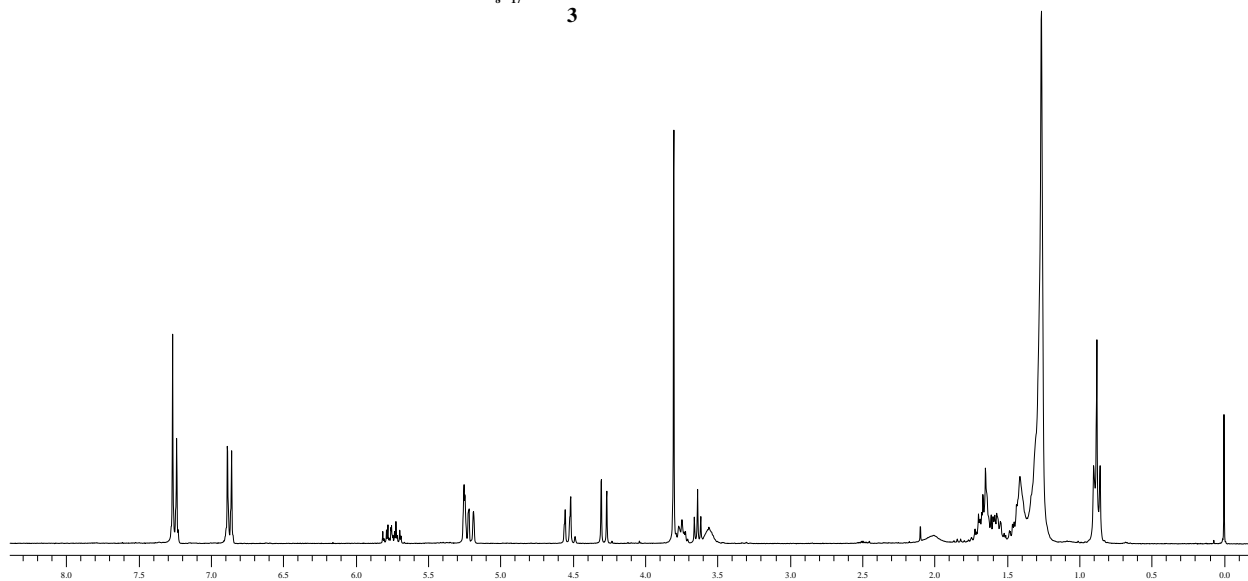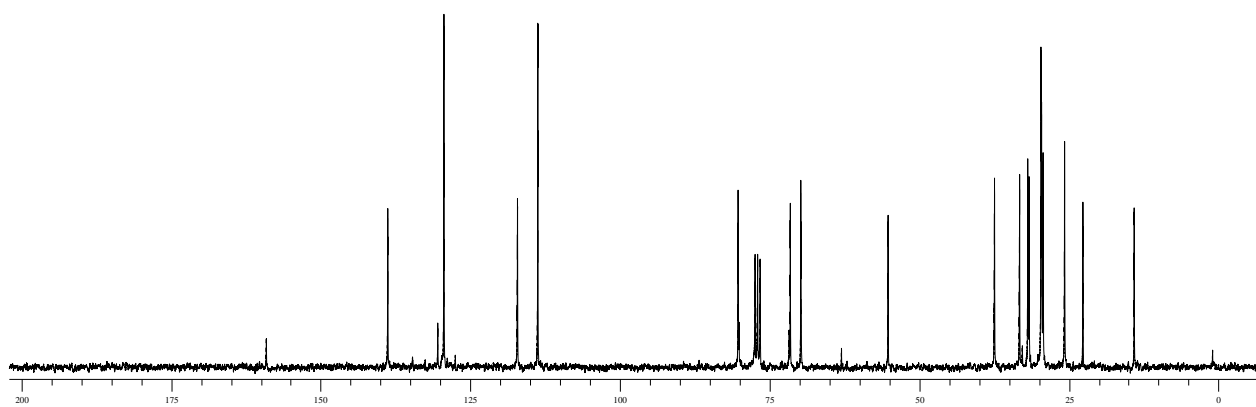

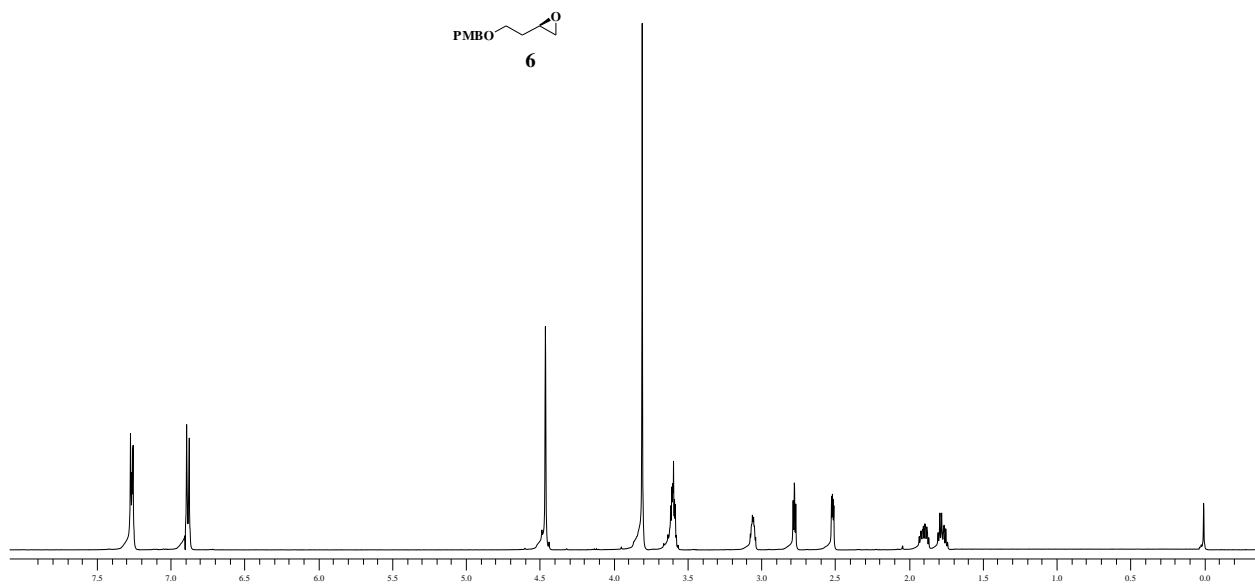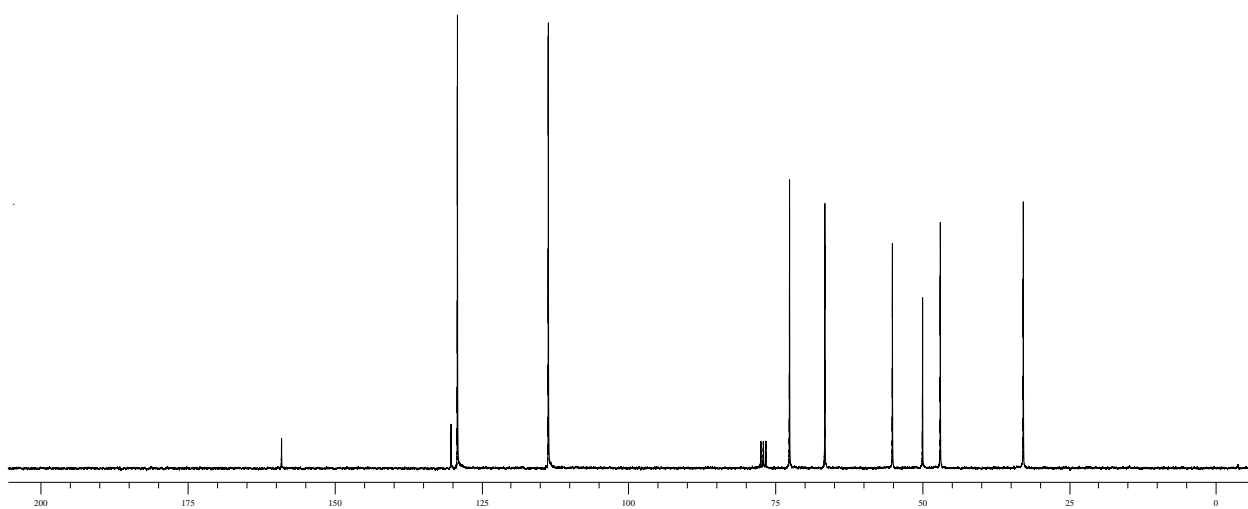

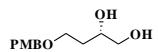

14

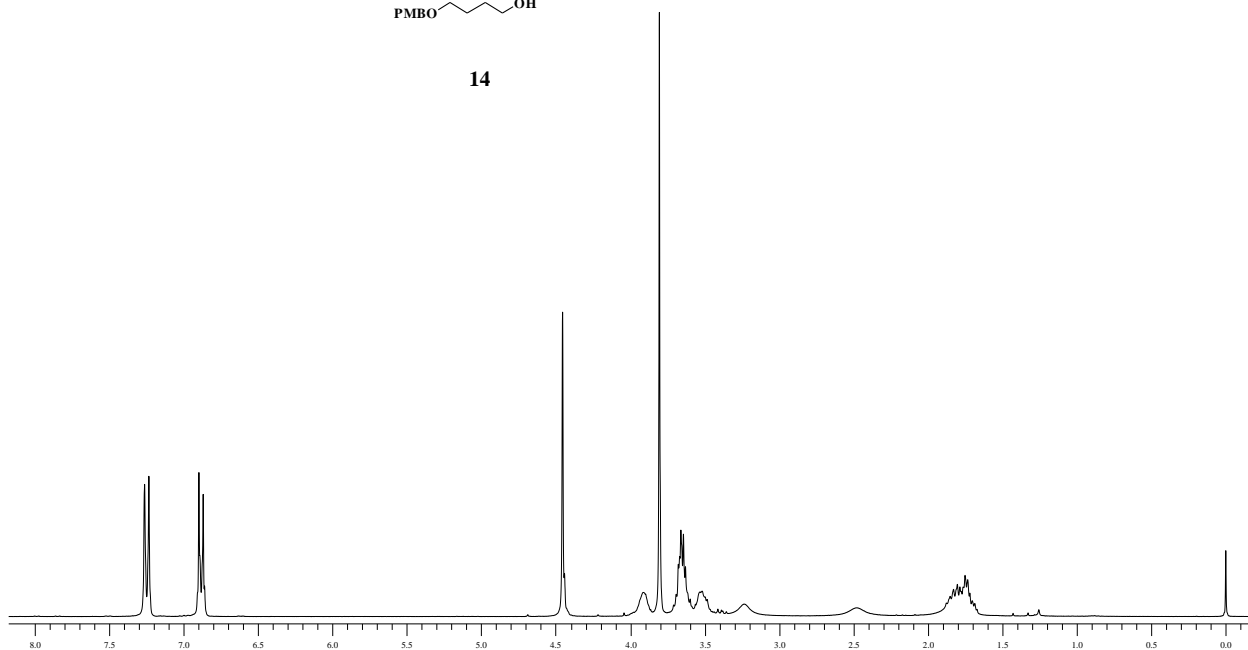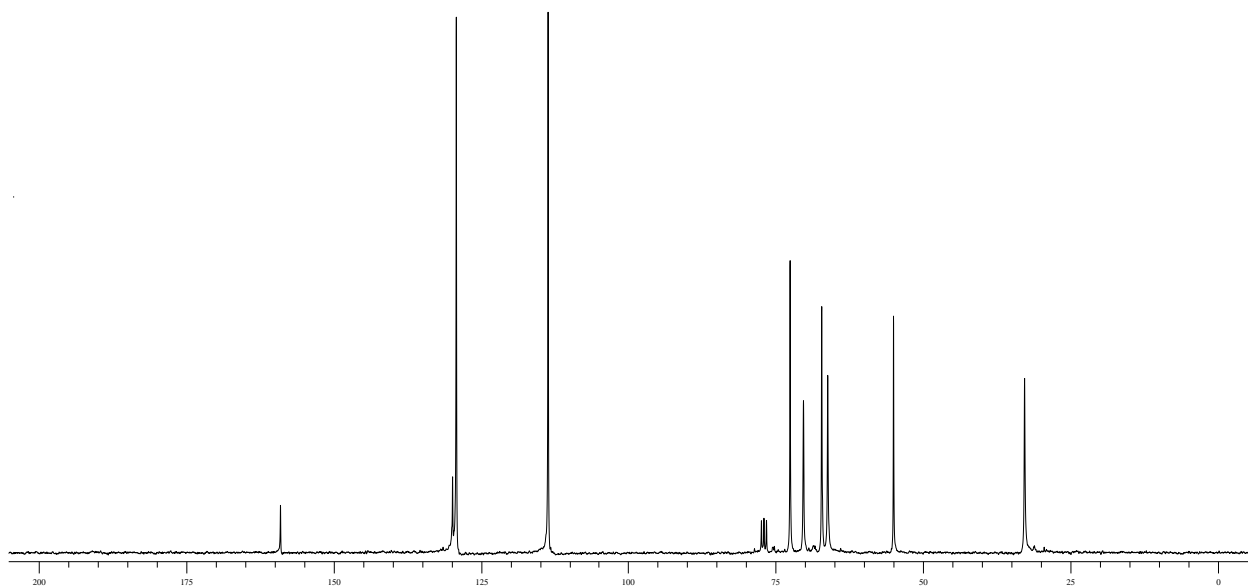

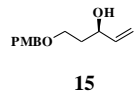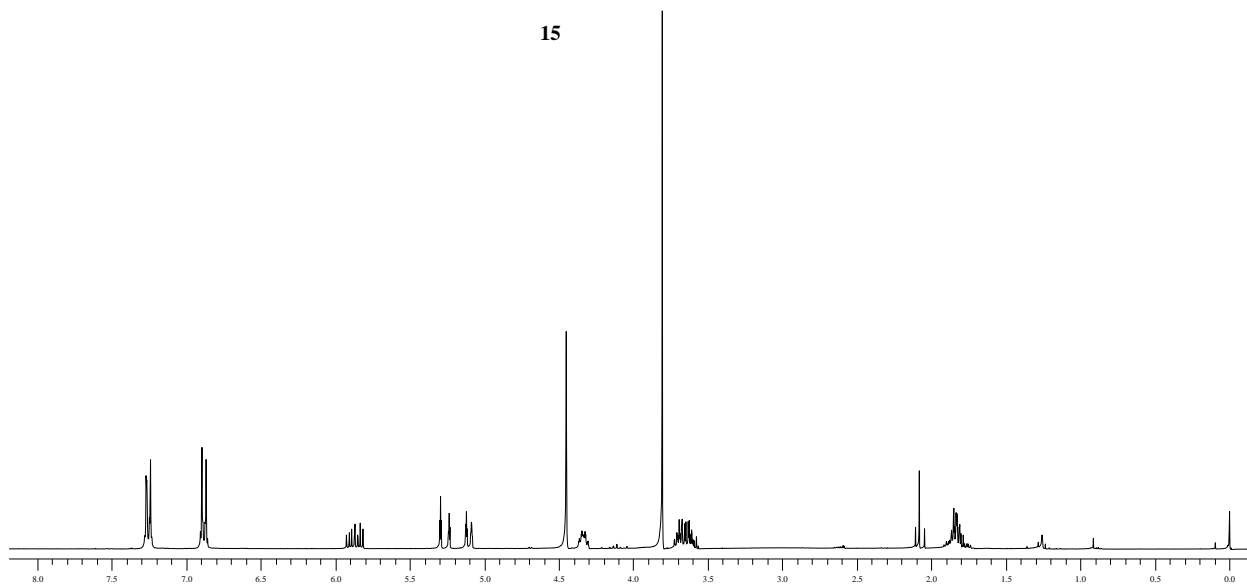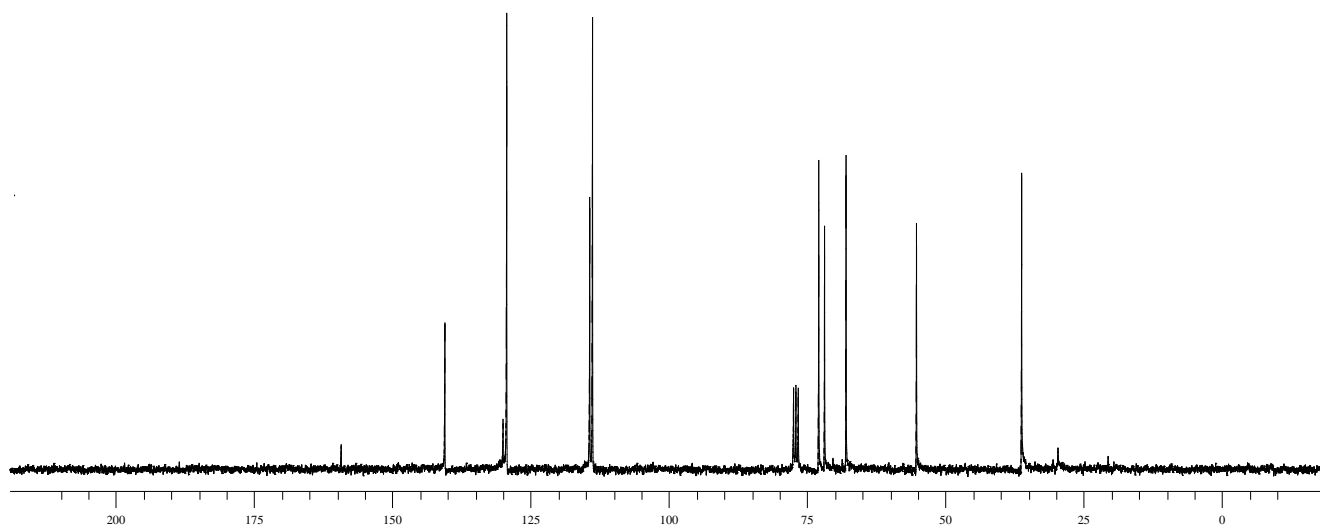

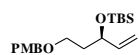

16

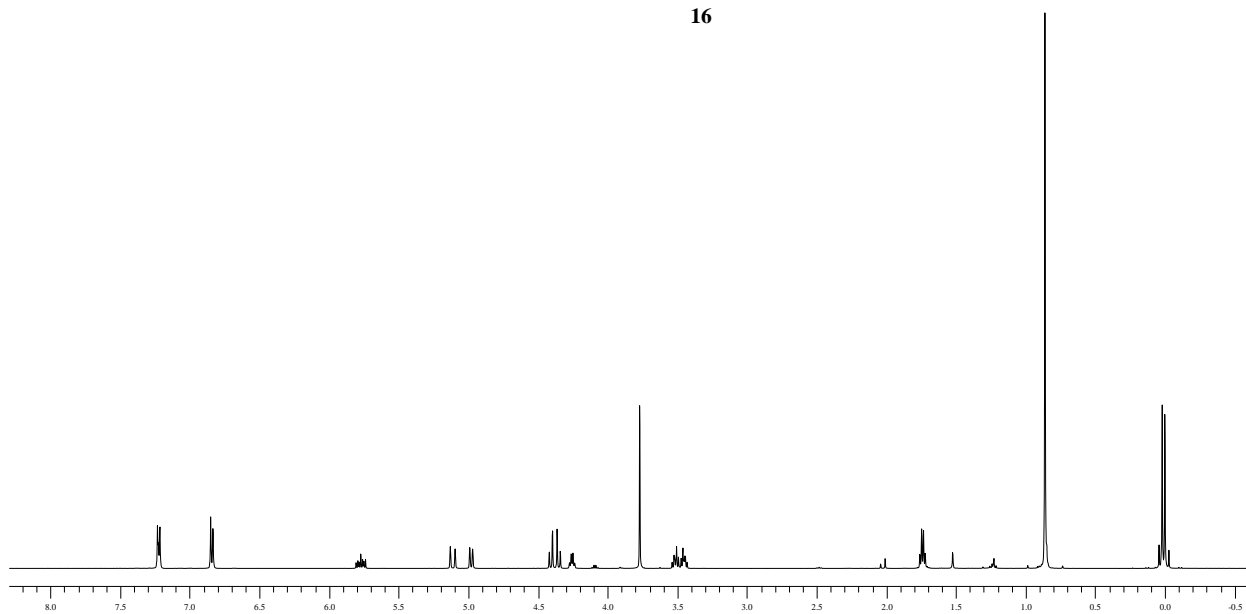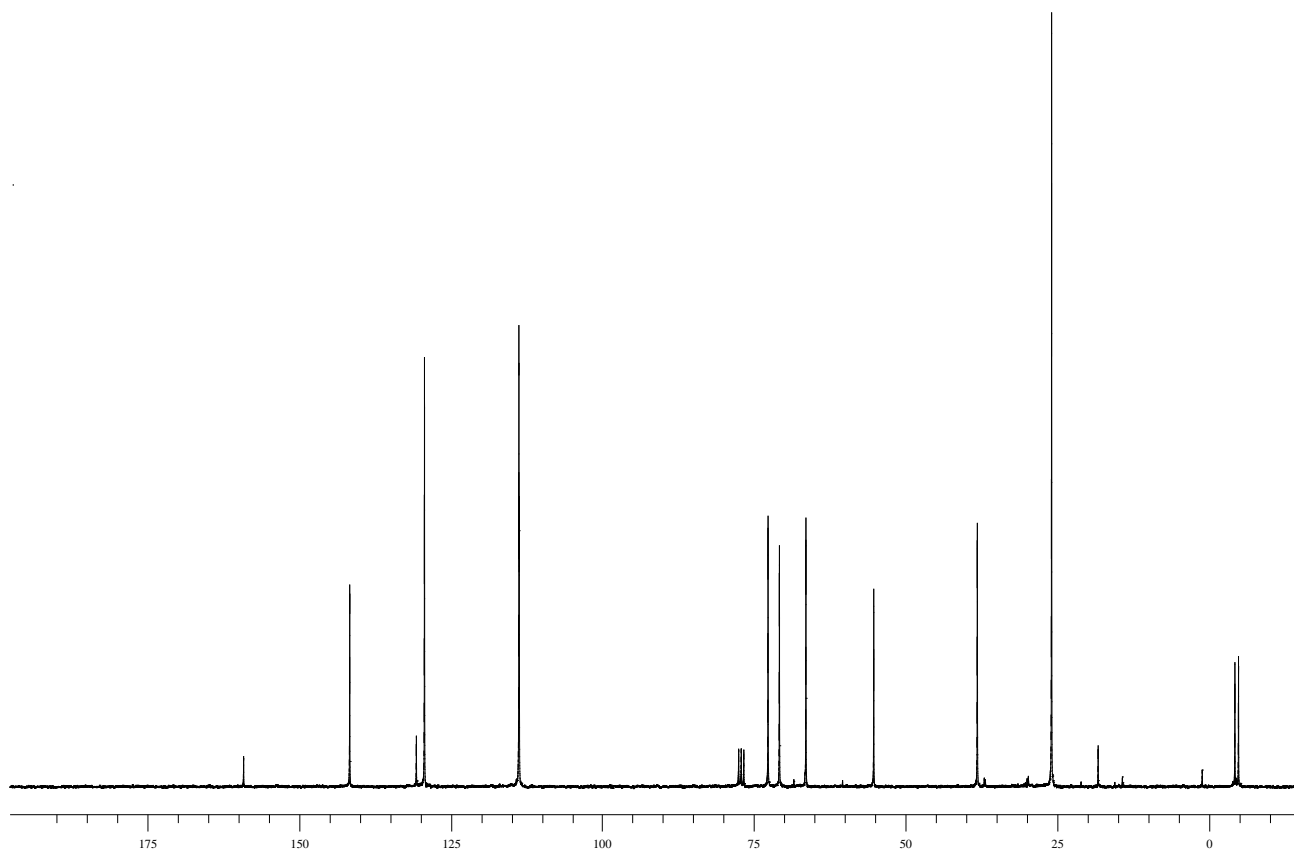

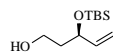

17

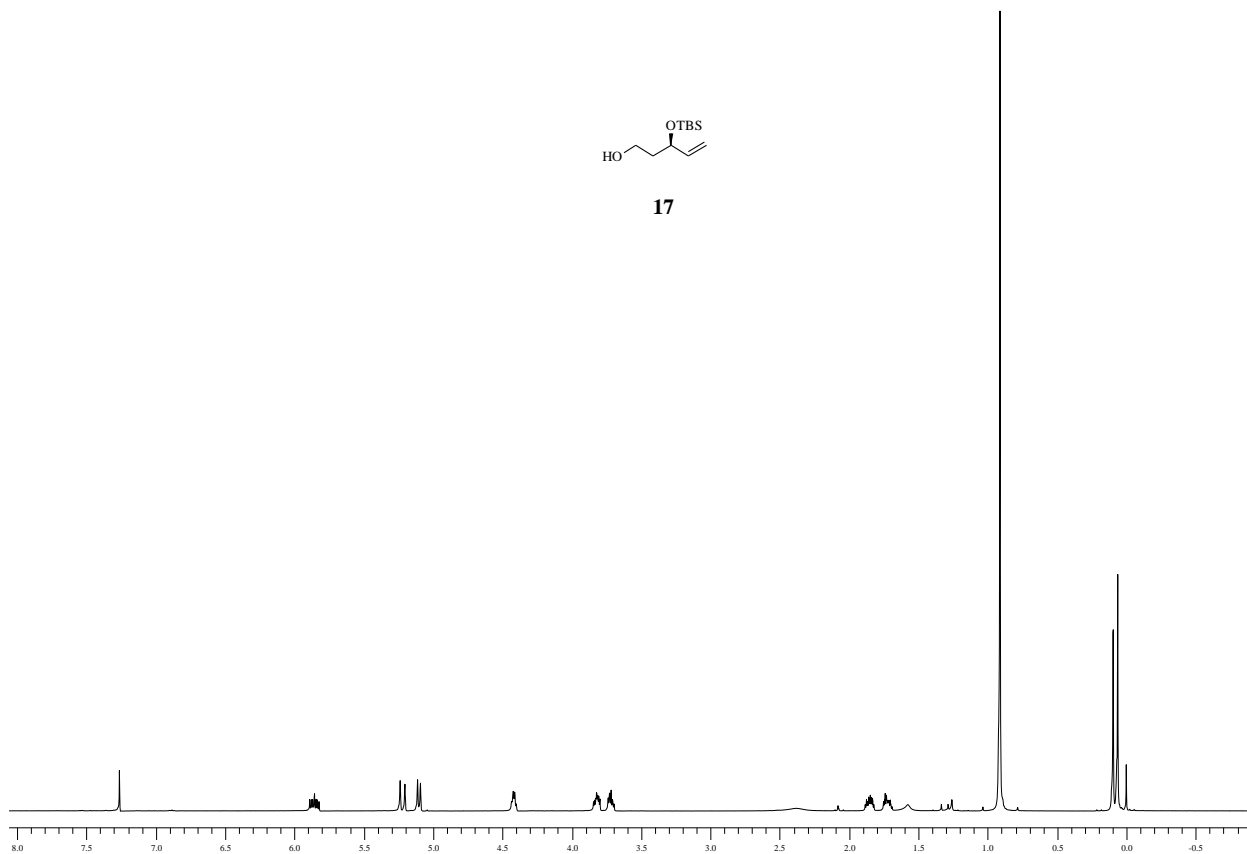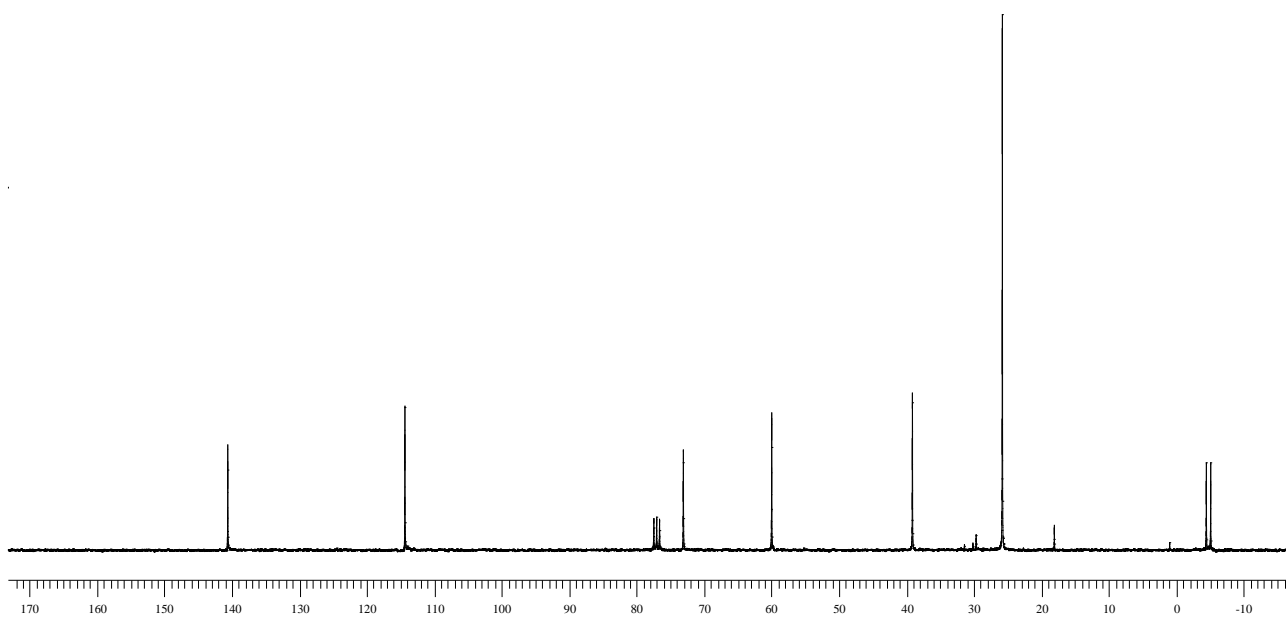

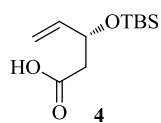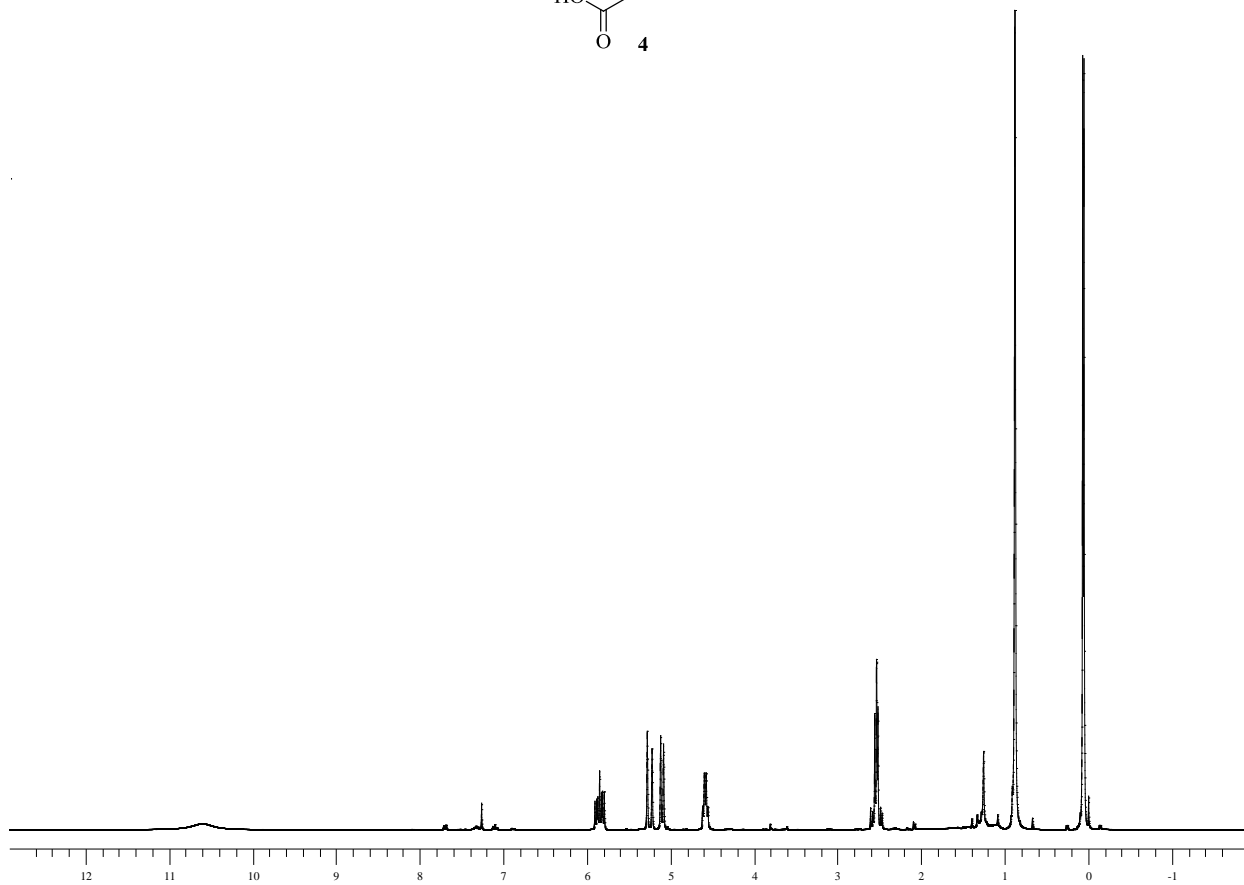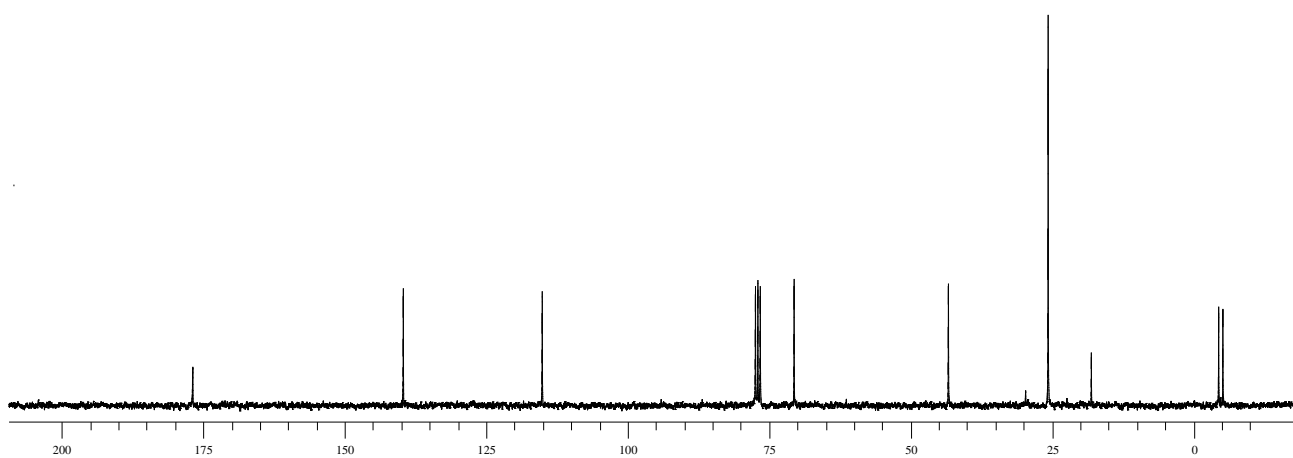



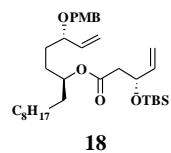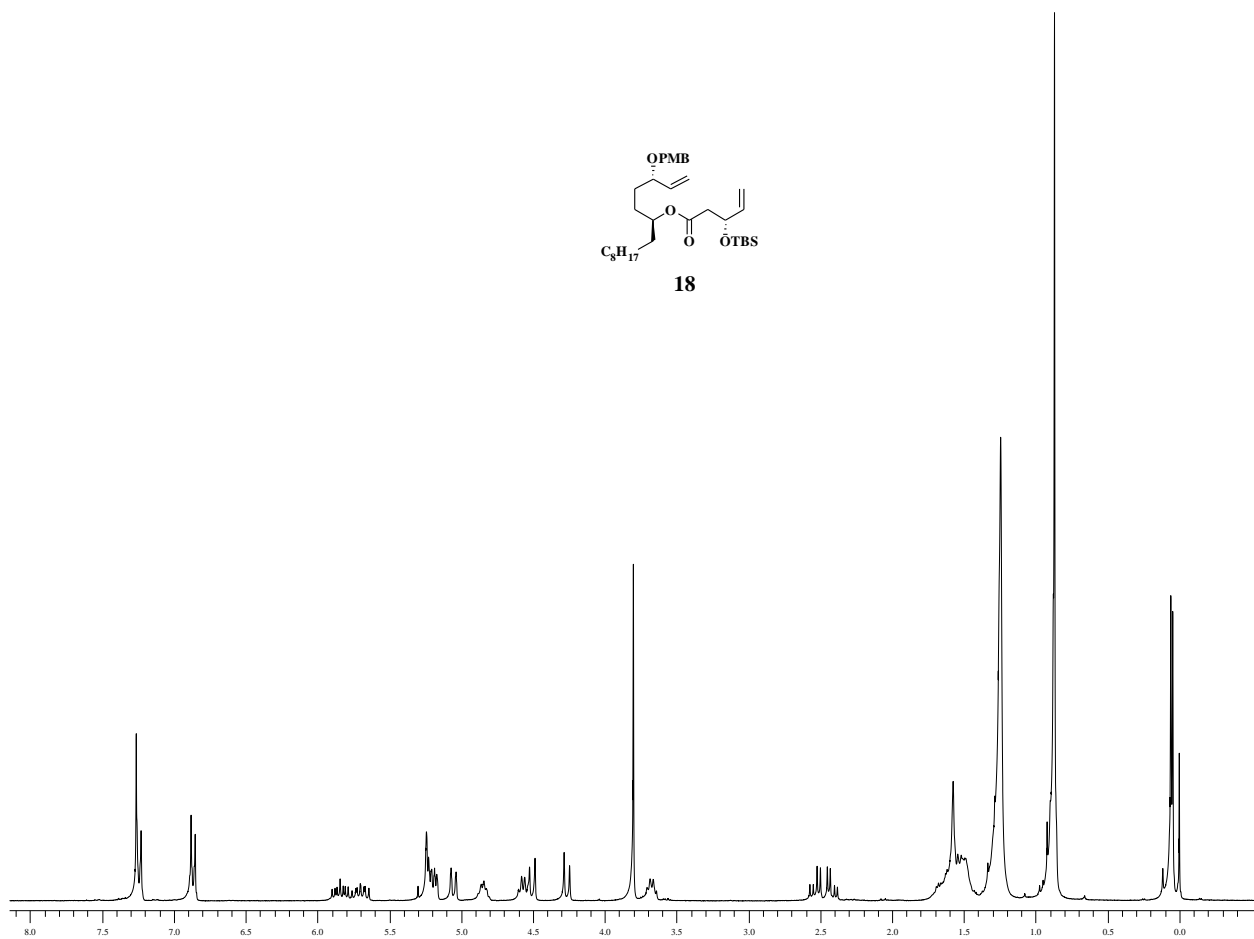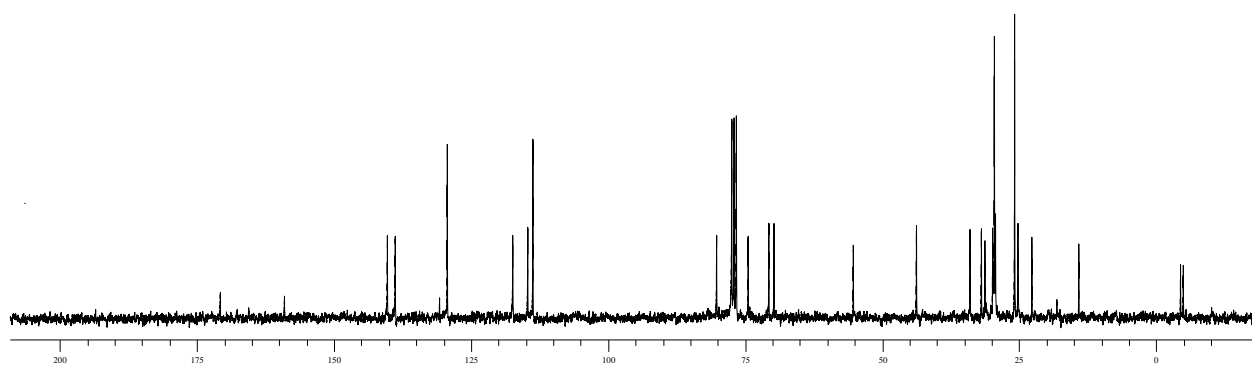

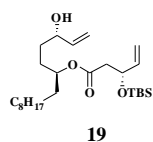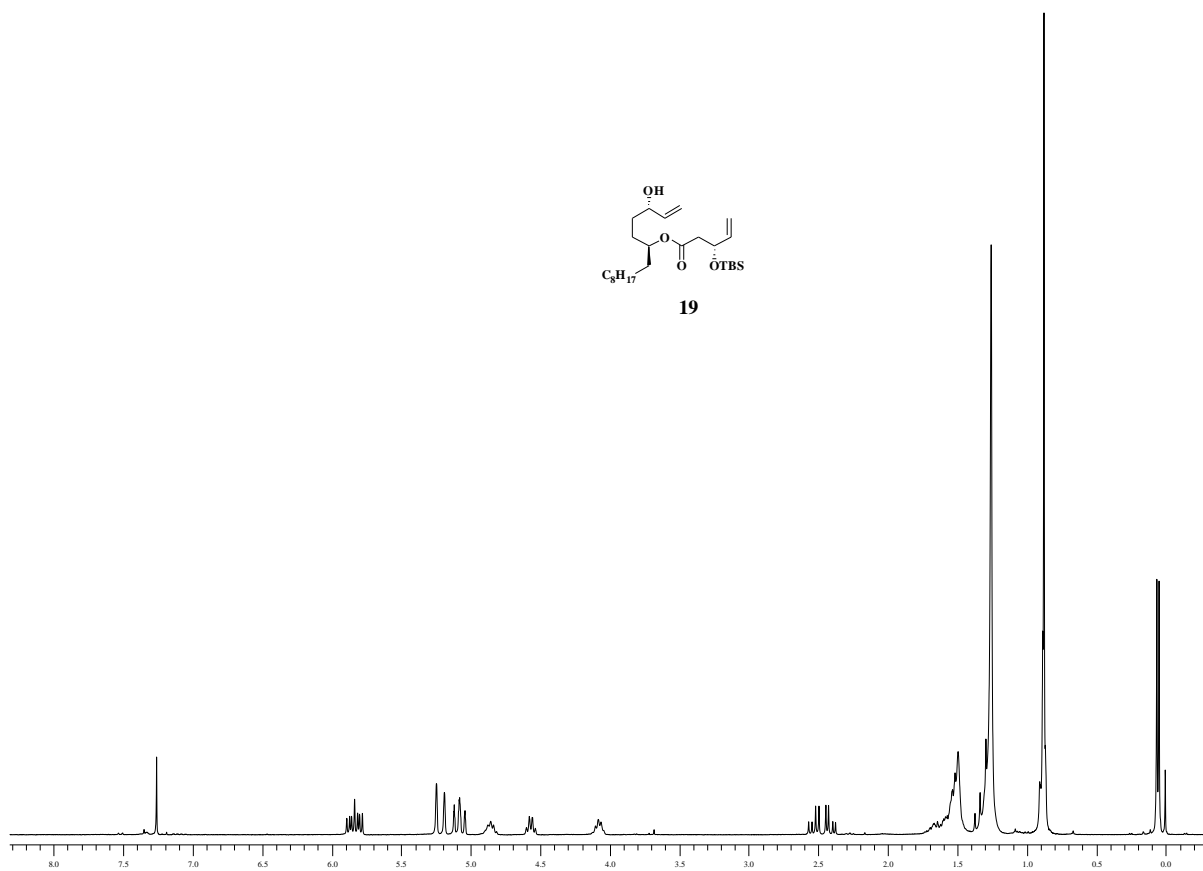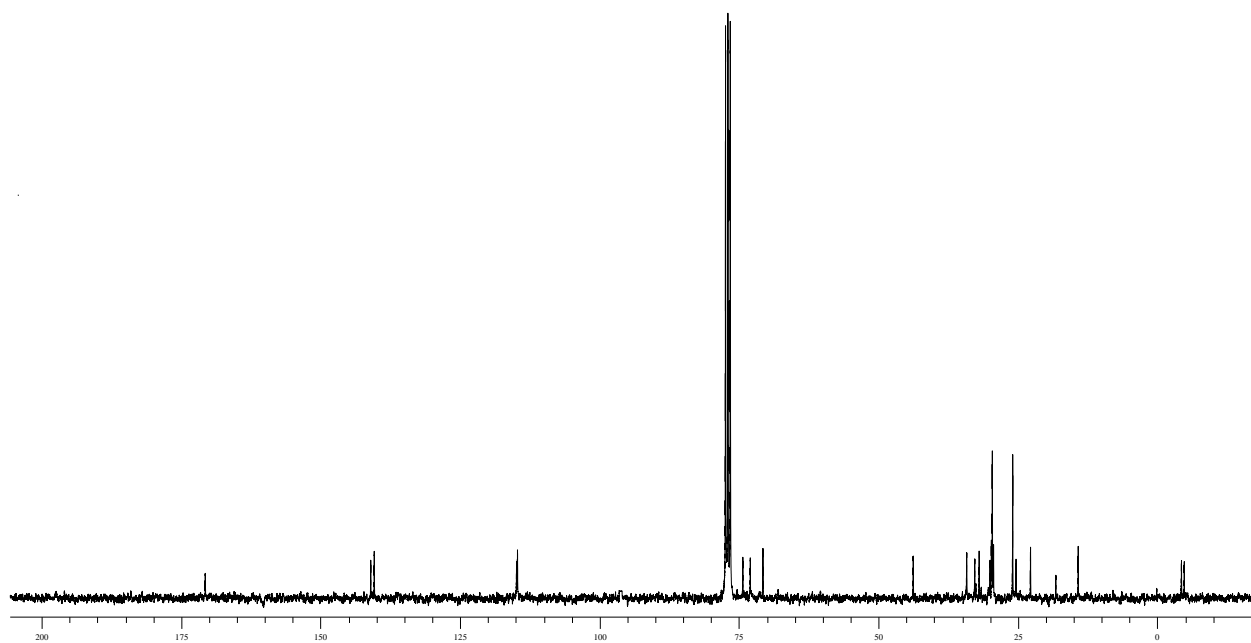

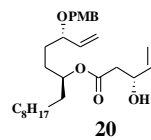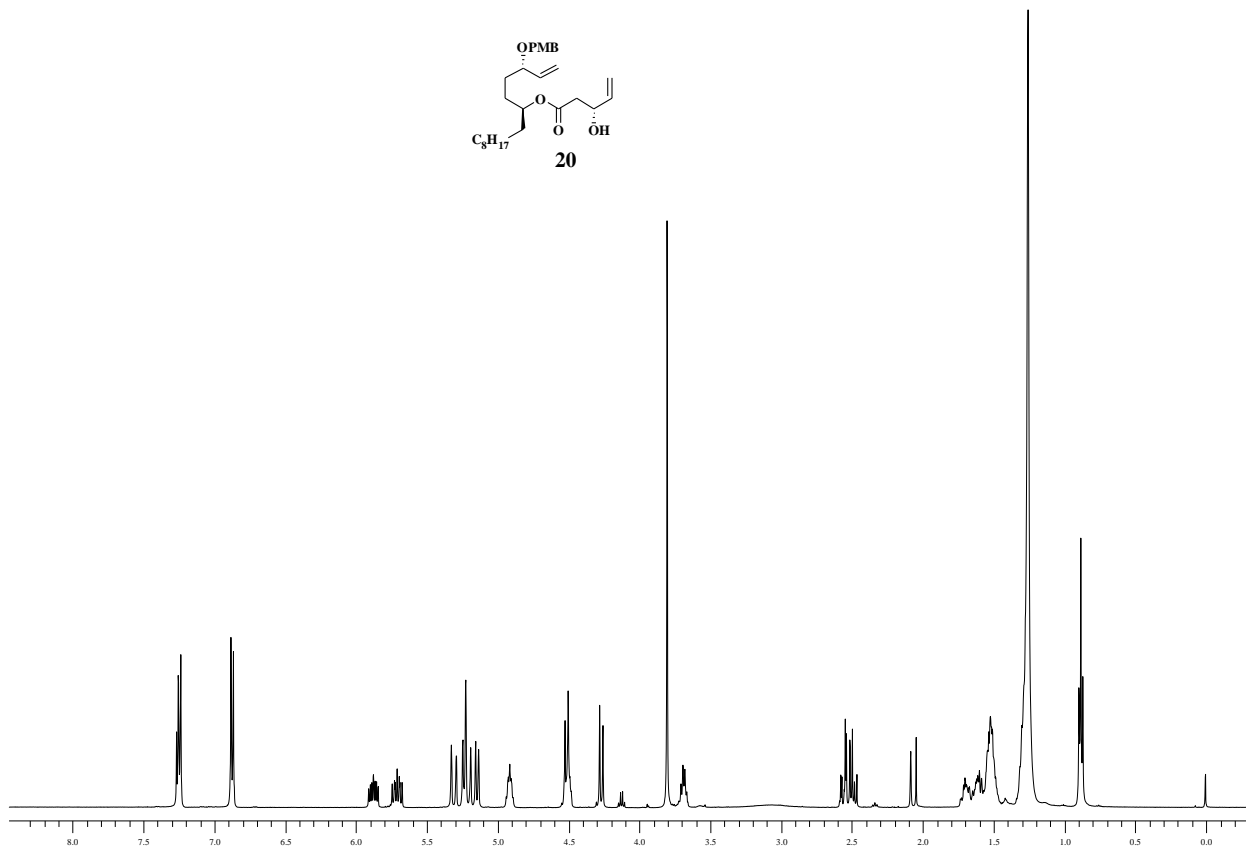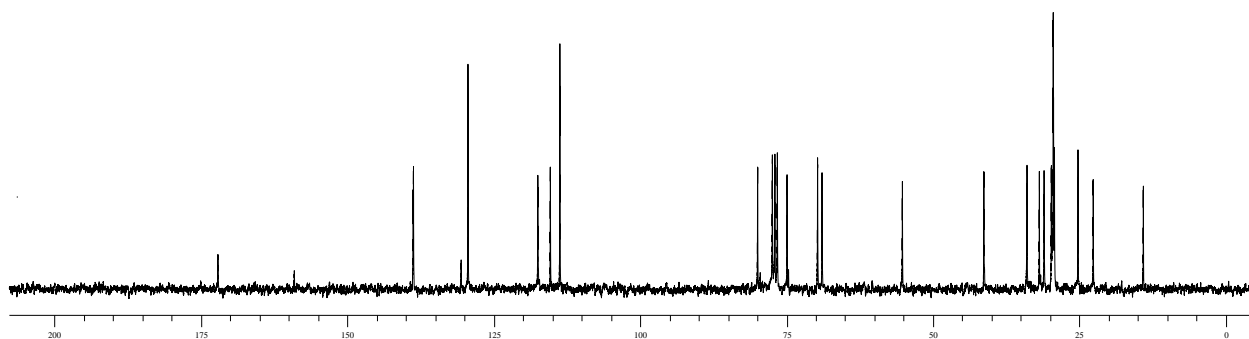

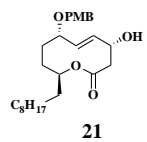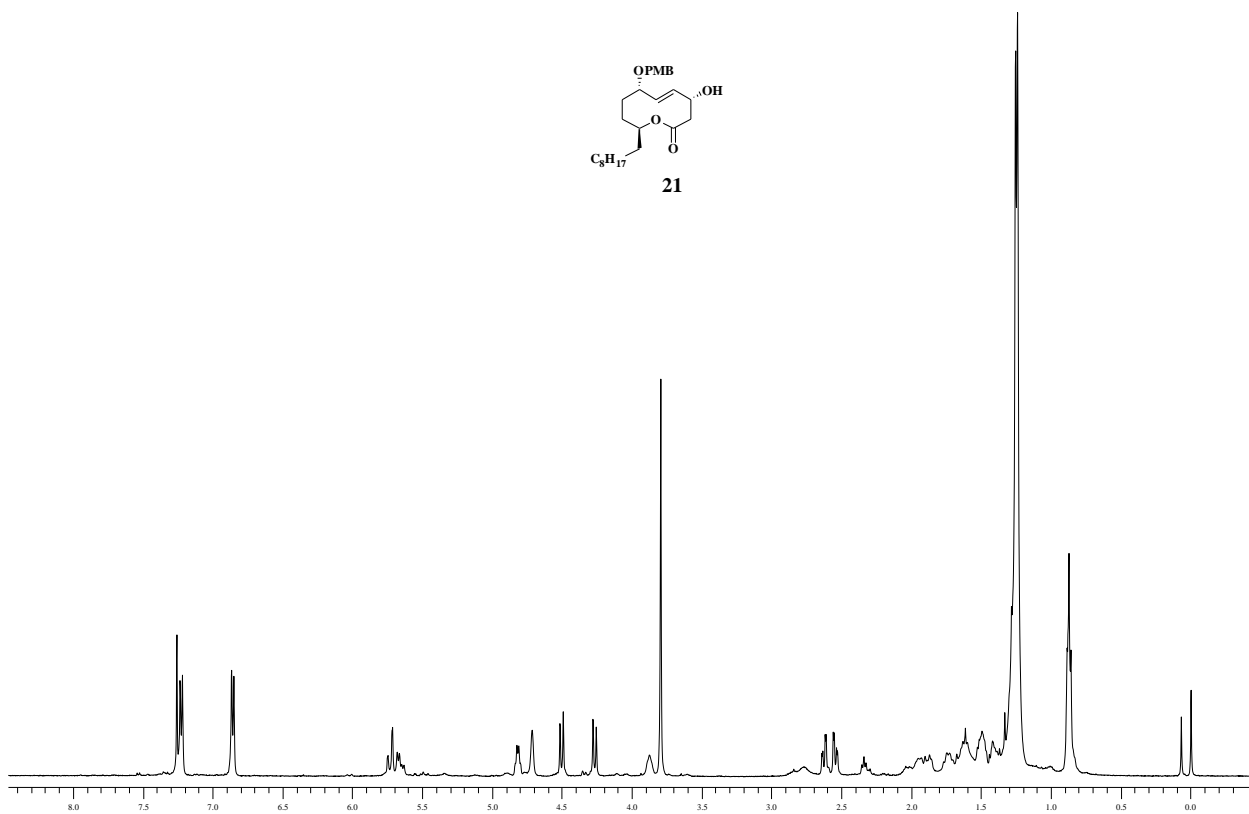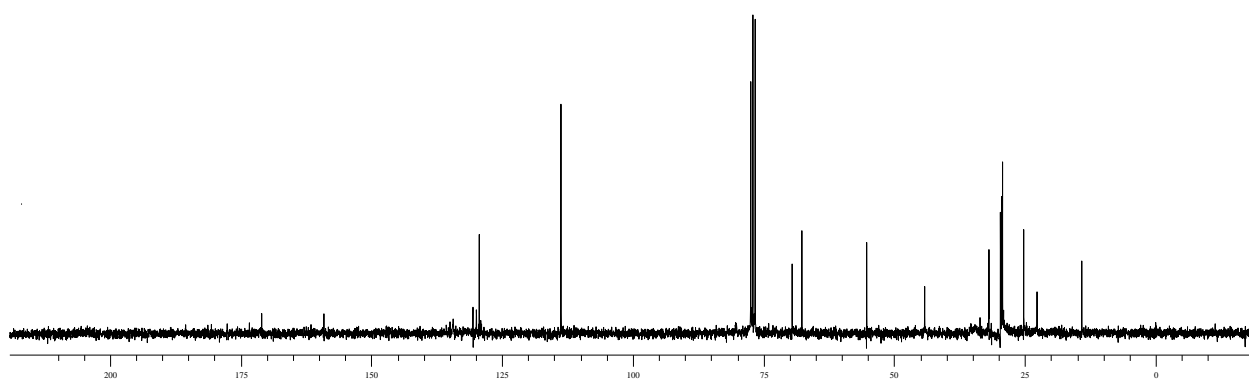

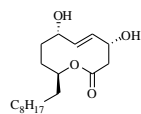

**Seimatopolide B (2)**

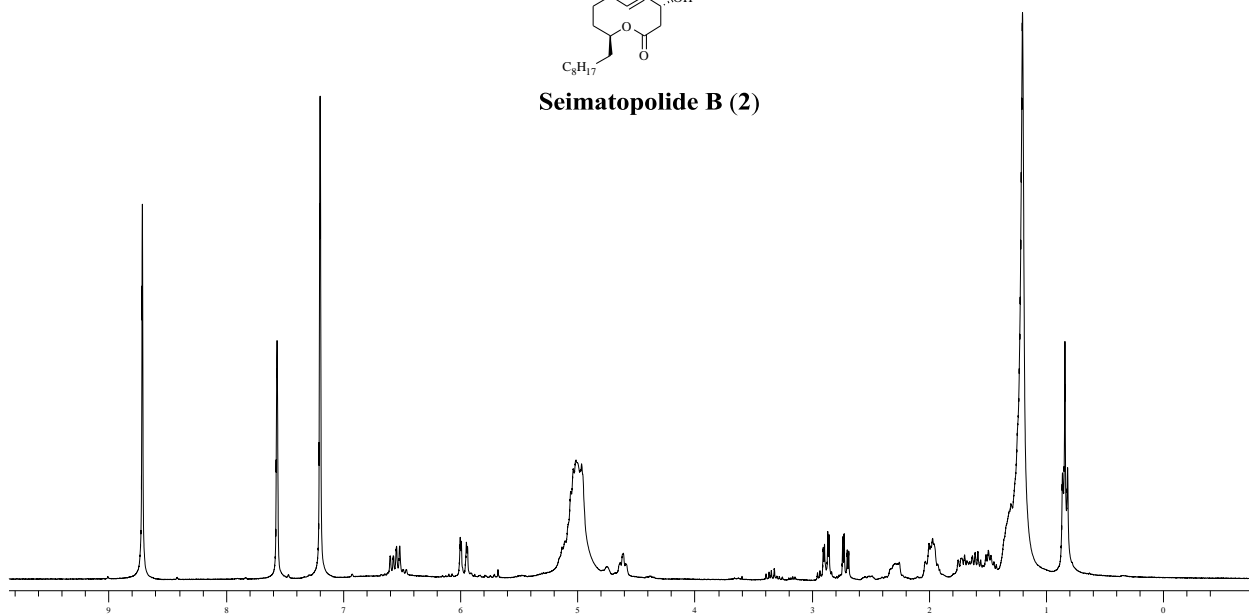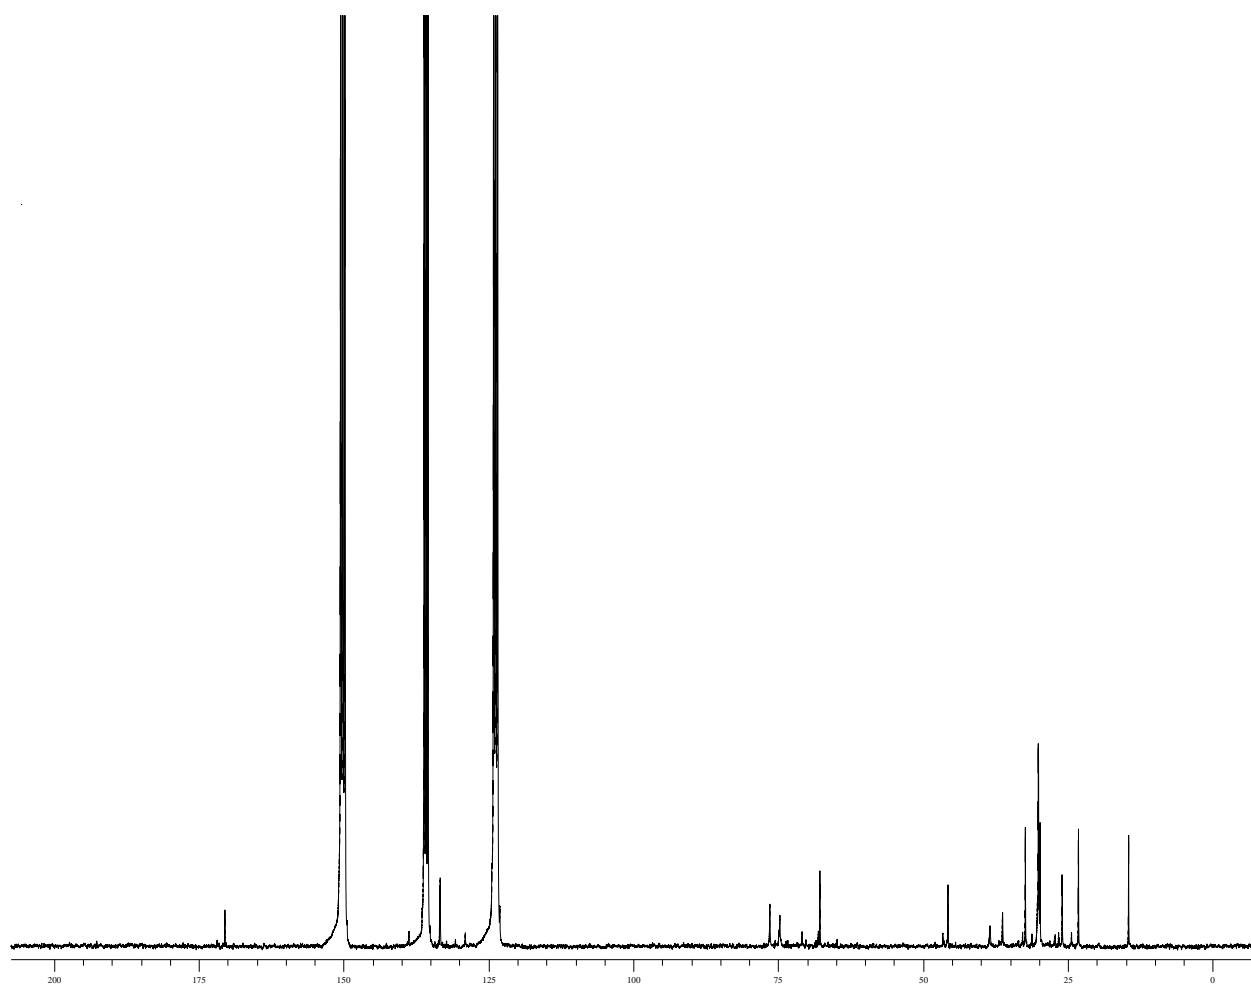

### NOESY Spectrum for **2a** (pyridine-d<sub>5</sub>, 500 MHz)

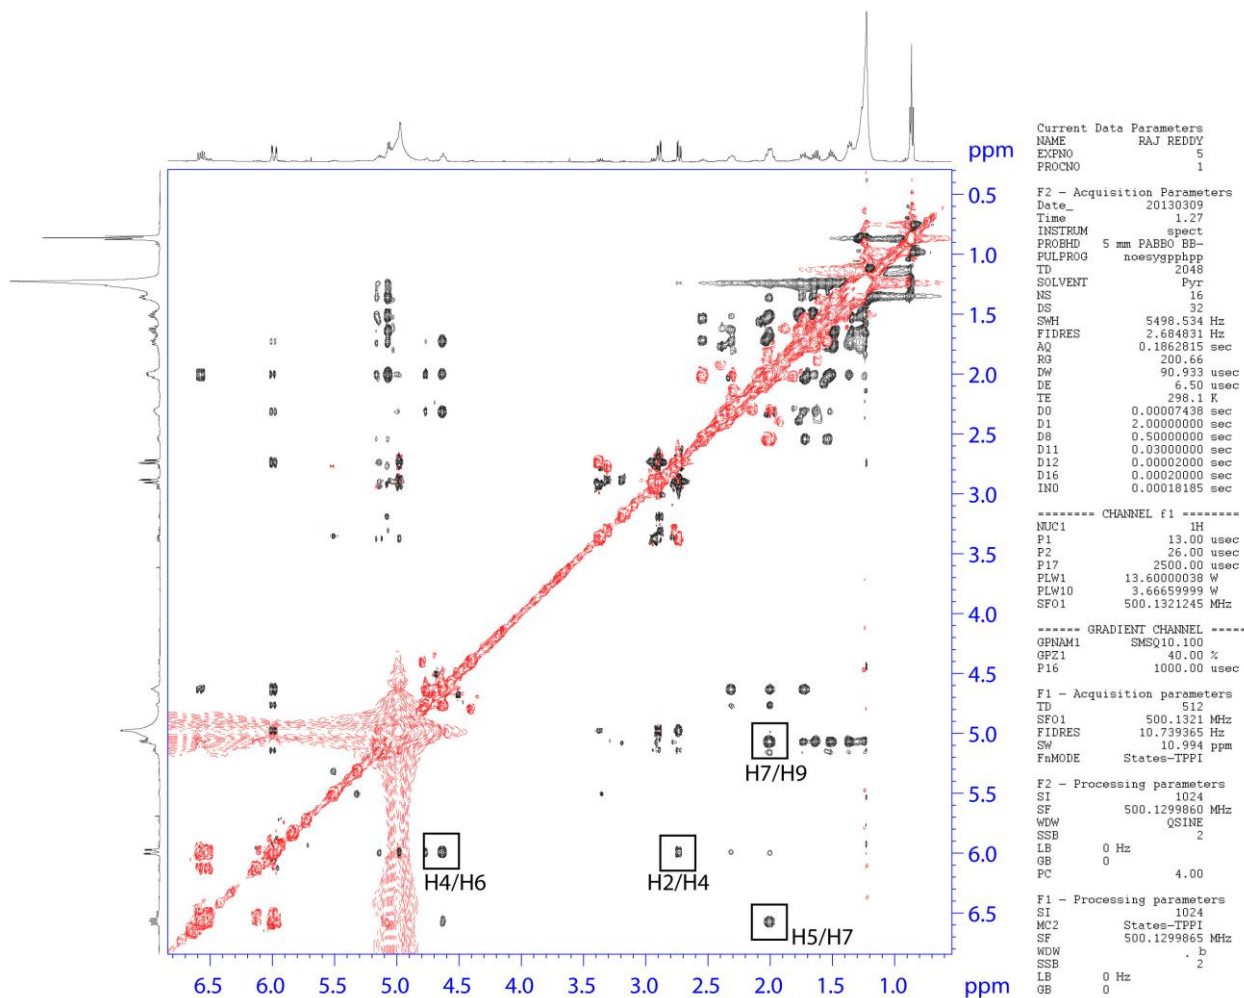

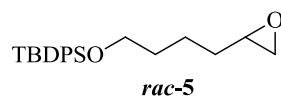

D:\LabSolutions\Common\Data\Project1\crr\51112...004.lcd  
Acquired by : Admin  
Sample Name : CRR-CO-R-S  
Sample ID : CRR-CO-R-S  
Vial # : 14  
Injection Volume : 10 uL  
Data File Name : 51112...004.lcd  
Method File Name : PIPER-H-ISO.lcm  
Batch File Name : 311012...lcb  
Report File Name : NPL HPLC REPORT new.lcr  
Data Acquired : 11/5/2012 7:56:41 PM  
Data Processed : 11/5/2012 8:31:43 PM  
COLUMN:CHIRALPAK-OD-H;250X4.6MM,5UMOBILEPHASE;2%IPA IN HEXANEFLOWRATE;1.0ML/MIN

<Chromatogram>

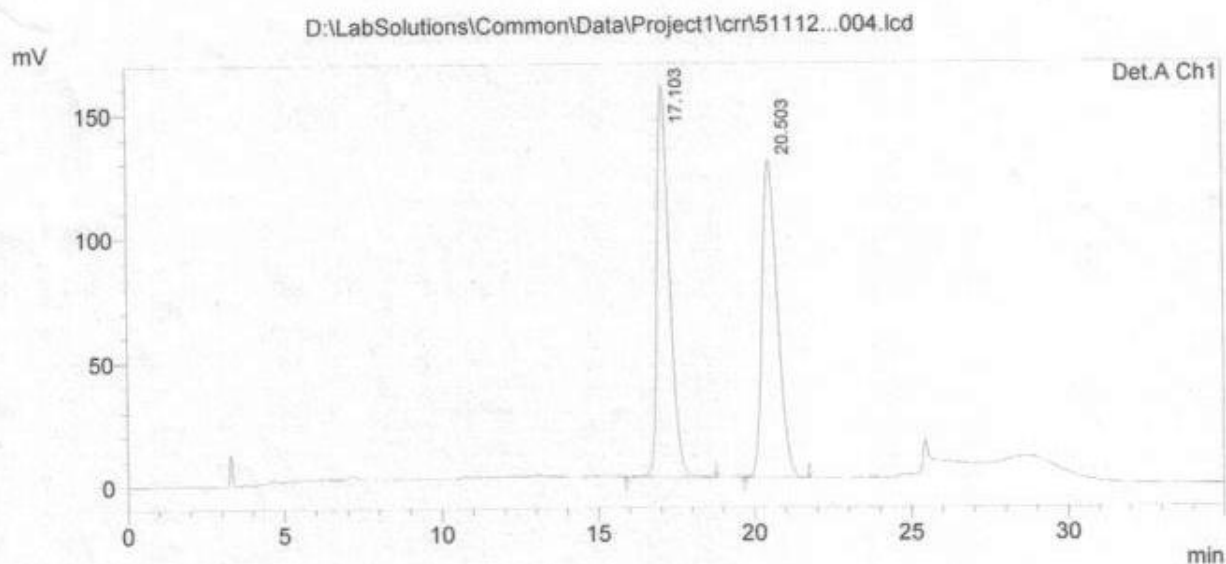

1 Det.A Ch1/210nm

PeakTable

Detector A Ch1 210nm

| Peak# | Ret. Time | Area    | Height | Area %  |
|-------|-----------|---------|--------|---------|
| 1     | 17.103    | 4372698 | 157467 | 50.144  |
| 2     | 20.503    | 4347585 | 127465 | 49.856  |
| Total |           | 8720283 | 284932 | 100.000 |

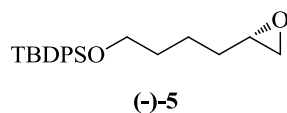

D:\LabSolutions\Common\Data\Project1\crr\51112...002.lcd  
Acquired by : Admin  
Sample Name : CRR-CHIRAL-SS  
Sample ID : CRR-CHIRAL-SS  
Vial # : 12  
Injection Volume : 10 µL  
Data File Name : 51112...002.lcd  
Method File Name : PIPER-H-ISO.lcm  
Batch File Name : 311012...lcb  
Report File Name : NPL HPLC REPORT new.lcr  
Data Acquired : 11/5/2012 6:44:05 PM  
Data Processed : 11/5/2012 7:19:07 PM  
COLUMN:CHIRALPAK-OD-H;250X4.6MM,5U  
MOBILEPHASE:2%IPA IN HEXANE 0.5% IPA + H<sub>2</sub>O  
FLOWRATE:1.0ML/MIN  
DETECTION:210NM

<Chromatogram>

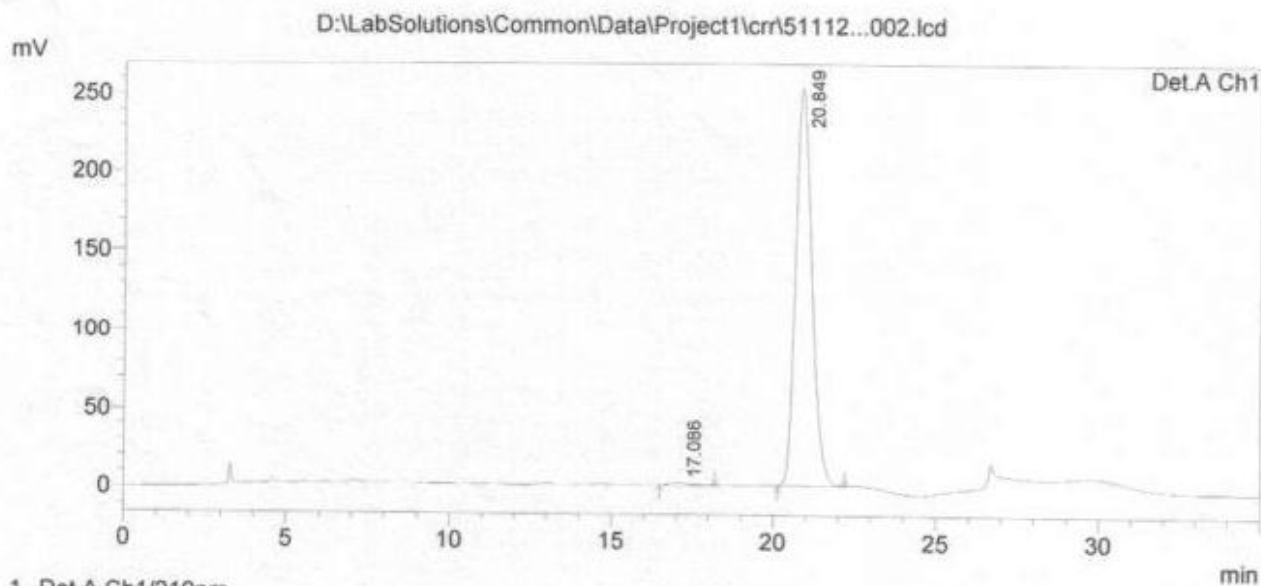

PeakTable

Detector A Ch1 210nm

| Peak# | Ret. Time | Area    | Height | Area %  |
|-------|-----------|---------|--------|---------|
| 1     | 17.086    | 49630   | 1180   | 0.562   |
| 2     | 20.849    | 8785326 | 252310 | 99.438  |
| Total |           | 8834957 | 253490 | 100.000 |



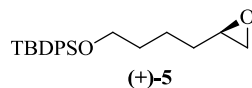

D:\LabSolutions\Common\Data\Project1\crr\51112...001.lcd

Acquired by : Admin  
Sample Name : CRR-CHIRAL-RR  
Sample ID : CRR-CHIRAL-RR  
Vial # : 11  
Injection Volume : 10 uL  
Data File Name : 51112...001.lcd  
Method File Name : PIPER-H-ISO.lcm  
Batch File Name : 311012...lcb  
Report File Name : NPL HPLC REPORT new.lcr  
Data Acquired : 11/5/2012 6:07:47 PM  
Data Processed : 11/5/2012 6:42:49 PM  
COLUMN:CHIRALPAK-OD-H;250X4.6MM,5U  
MOBILEPHASE:0%IPA IN HEXANE 0.5%IPA + HEA  
FLOWRATE:1.0ML/MIN  
DETECTION:210NM

<Chromatogram>

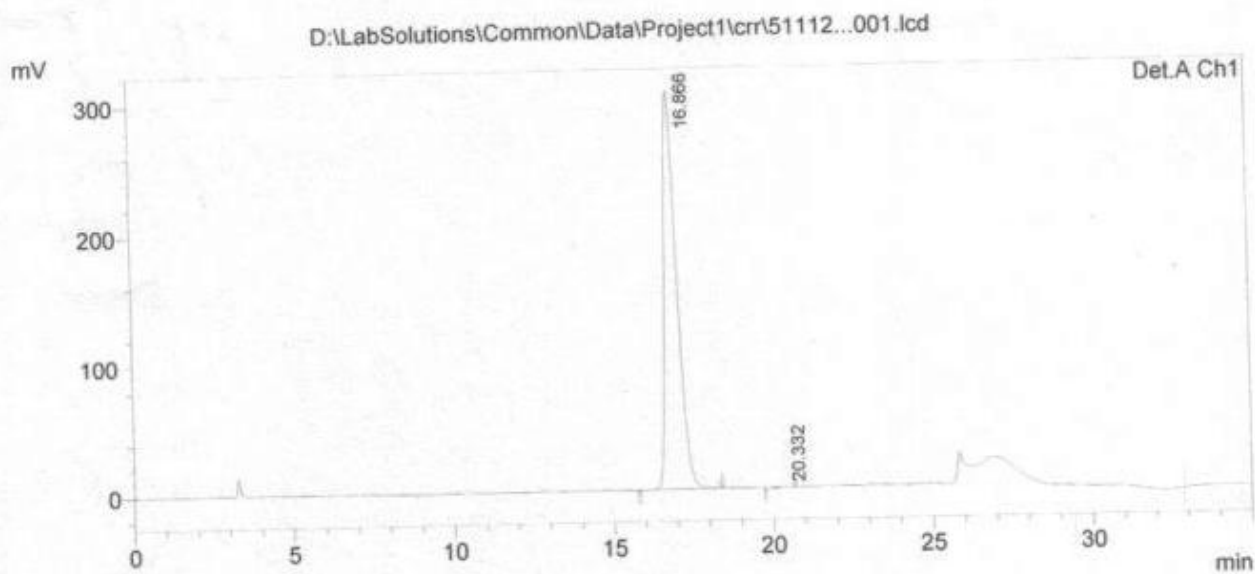

PeakTable

Detector A Ch1 210nm

| Peak# | Ret. Time | Area    | Height | Area %  |
|-------|-----------|---------|--------|---------|
| 1     | 16.866    | 8443140 | 305460 | 99.915  |
| 2     | 20.332    | 7213    | 211    | 0.085   |
| Total |           | 8450353 | 305670 | 100.000 |

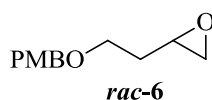

Sample Name :CRR-Rac-6  
Sample ID :--  
Acquired By :BSK  
Date Acquired : 11/5/2012 3:16:47 PM  
Method Filename : D:\Methods\External-CHIRAL.lcm  
Data : D:\CRR-Rac-6-L.lcd  
Description : Column: Chiralpak AD-H,250 x 4.6mm,5u  
Flow Rate: 1.2ml/min  
Column Temp: 35°C  
Mobile Phase :Hexane : Ethanol (99:01)

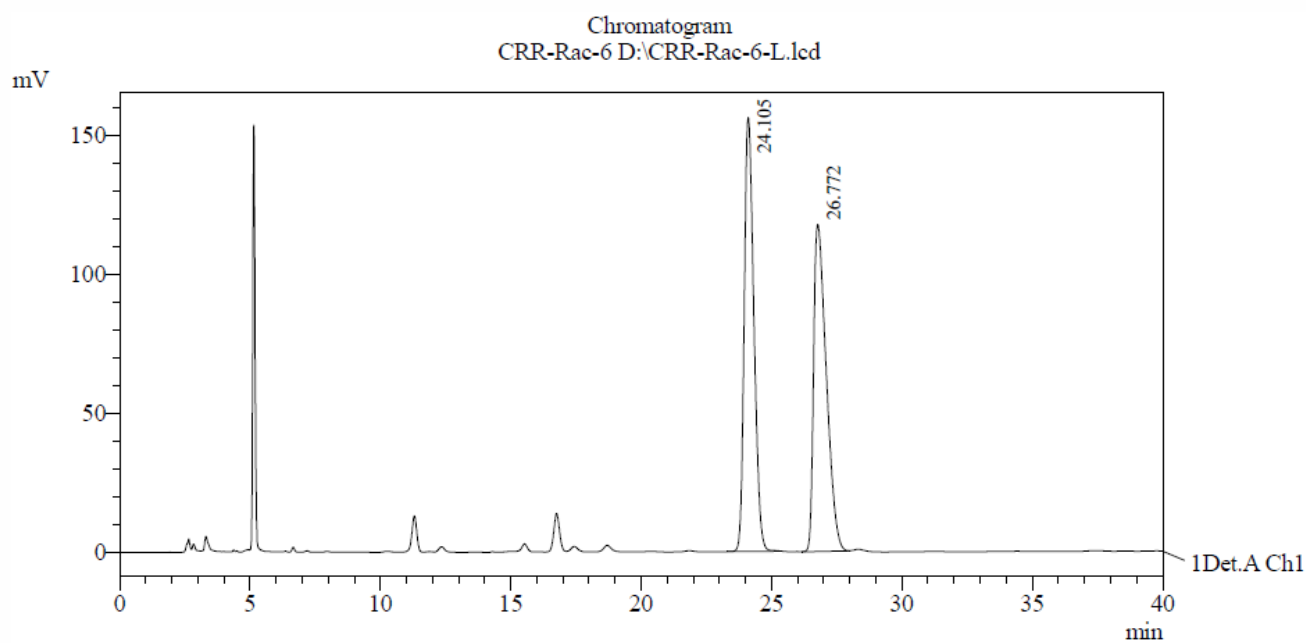

Detector A Ch1 220nm

PeakTable

| Peak# | Ret. Time | Area    | Area %  | Relative Retention Time |
|-------|-----------|---------|---------|-------------------------|
| 1     | 24.105    | 4013273 | 50.211  | 1.000                   |
| 2     | 26.772    | 3979470 | 49.789  | 1.111                   |
| Total |           | 7992744 | 100.000 |                         |

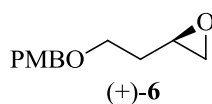

Sample Name : (R,R)-6  
Sample ID : --  
Acquired By : BSK  
Date Acquired : 11/5/2012 3:57:49 PM  
Method Filename : D:\Methods\External-CHIRAL.lcm  
Data : D:\(R,R)-6-H.lcd  
Description : Column: Chiralpak AD-H, 250 x 4.6mm, 5µ  
Flow Rate: 1.2ml/min  
Column Temp: 35°C  
Mobile Phase : Hexane : Ethanol (99:01)

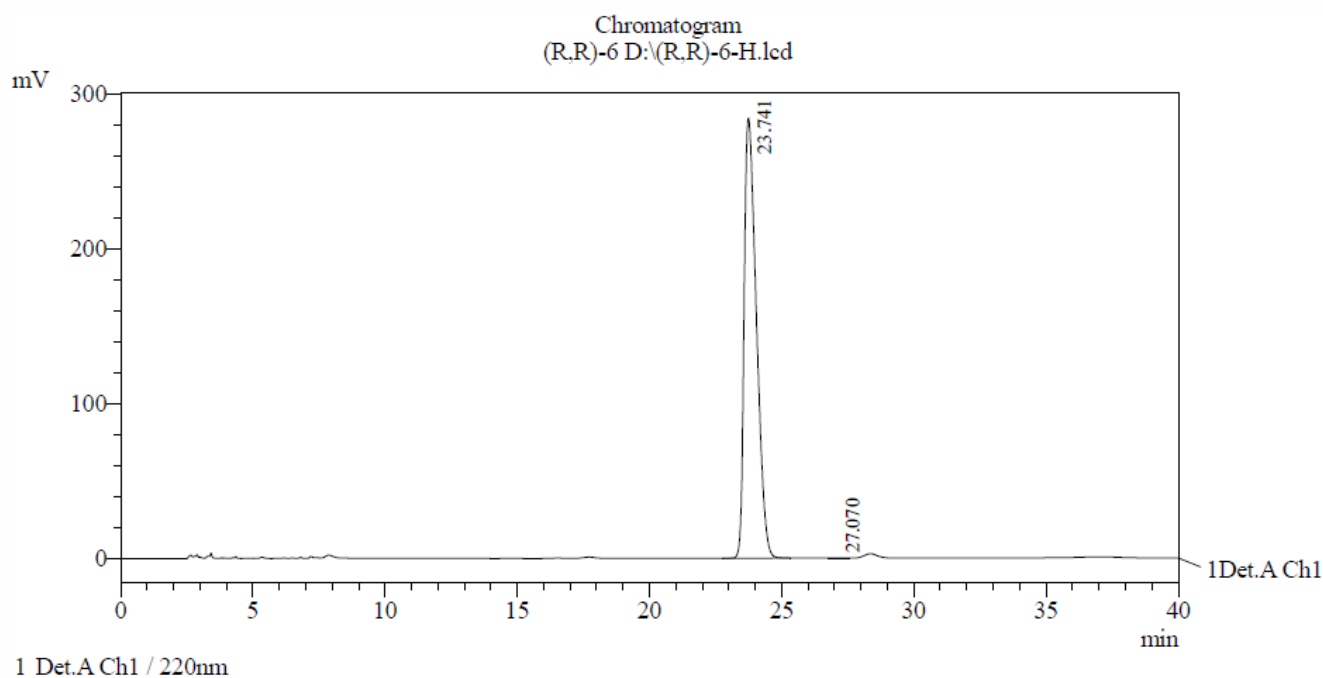

PeakTable

Detector A Ch1 220nm

| Peak# | Ret. Time | Area    | Area %  | Relative Retention Time |
|-------|-----------|---------|---------|-------------------------|
| 1     | 23.741    | 9118335 | 99.966  | 1.000                   |
| 2     | 27.070    | 3131    | 0.034   | 1.140                   |
| Total |           | 9121466 | 100.000 |                         |

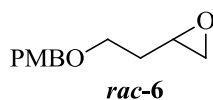

Sample Name :CRR-Rac-6  
Sample ID :-  
Acquired By :BSK  
Date Acquired : 11/6/2012 3:47:20 PM  
Method Filename : D:\Methods\External-CHIRAL.lcm  
Data : D:\CRR-Rac-6-M.lcd  
Description : Column: Chiralpak AD-H,250 x 4.6mm,5u  
Flow Rate: 1.2ml/min  
Column Temp: 35°C  
Mobile Phase :Hexane : Ethanol (99:01)

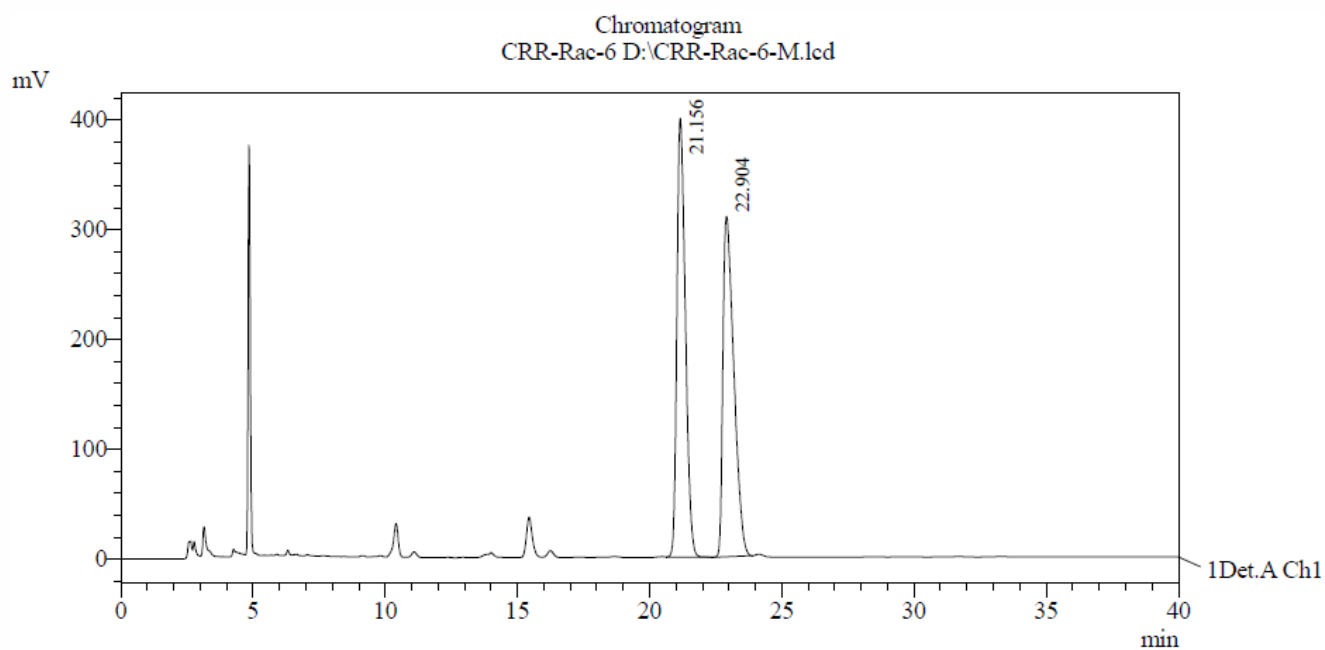

1 Det.A Ch1 / 220nm

PeakTable

Detector A Ch1 220nm

| Peak# | Ret. Time | Area     | Area %  | Relative Retention Time |
|-------|-----------|----------|---------|-------------------------|
| 1     | 21.156    | 8915297  | 50.101  | 0.924                   |
| 2     | 22.904    | 8879503  | 49.899  | 1.000                   |
| Total |           | 17794800 | 100.000 |                         |

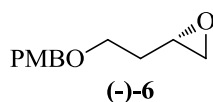

Sample Name : (S,S)-6  
Sample ID :-  
Acquired By : BSK  
Date Acquired : 11/6/2012 3:05:45 PM  
Method Filename : D:\Methods\External-CHIRAL.lcm  
Data : D:\(S,S)-6-E.lcd  
Description : Column: Chiralpak AD-H, 250 x 4.6mm, 5u  
Flow Rate: 1.2ml/min  
Column Temp: 35°C  
Mobile Phase : Hexane : Ethanol (99:01)

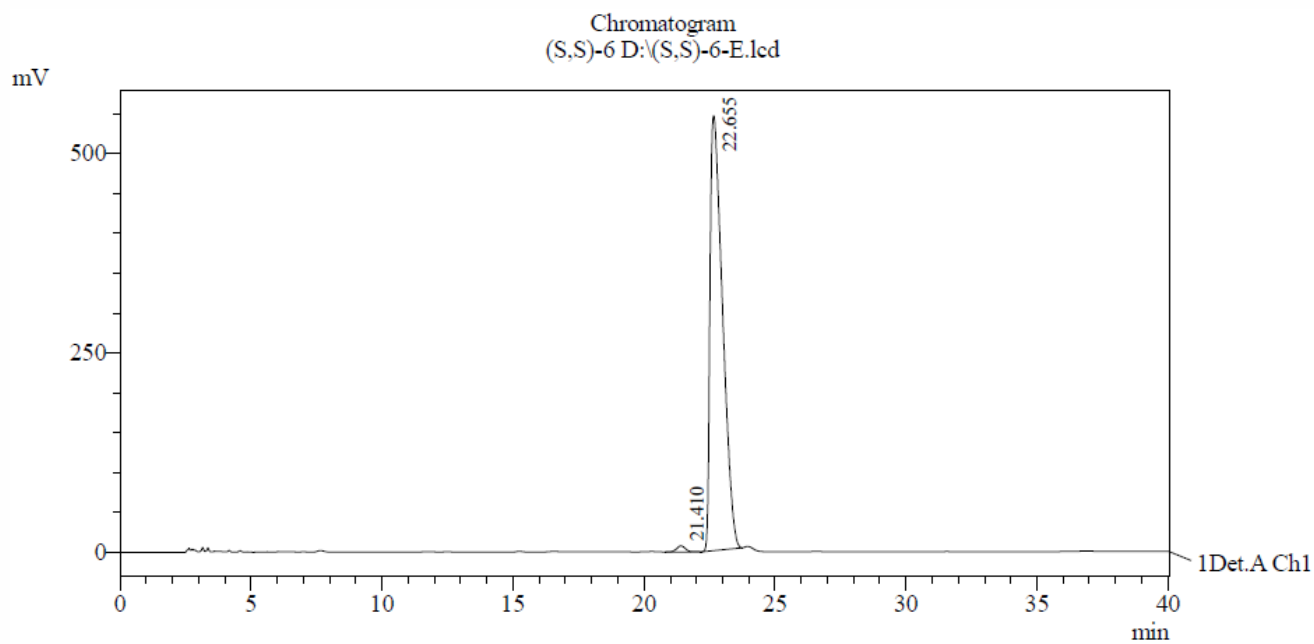

1 Det.A Ch1 / 220nm

PeakTable

Detector A Ch1 220nm

| Peak# | Ret. Time | Area     | Area %  | Relative Retention Time |
|-------|-----------|----------|---------|-------------------------|
| 1     | 21.410    | 173776   | 0.955   | 0.945                   |
| 2     | 22.655    | 18027058 | 99.045  | 1.000                   |
| Total |           | 18200834 | 100.000 |                         |
